# Supplementary material for: Comprehensive Analysis of SRO Gene Family in Sesamum indicum (L.) Reveals Its Association with Abiotic Stress Responses
Source: MDPI journal article supplement (doi:10.3390/ijms222313048), 2021-12-02

# Comprehensive Analysis of *SRO* Gene Family in Sesame (*Sesamum indicum* L.) Reveals Its Association with Abiotic Stress Responses

Aili Liu <sup>1</sup>, Mengyuan Wei <sup>1</sup>, Yong Zhou <sup>2</sup>, Donghua Li <sup>1</sup>, Rong Zhou <sup>1</sup>, Yanxin Zhang <sup>1</sup>, Xiurong Zhang <sup>1</sup>, Linhai Wang <sup>1,\*</sup> and Jun You <sup>1,\*</sup>

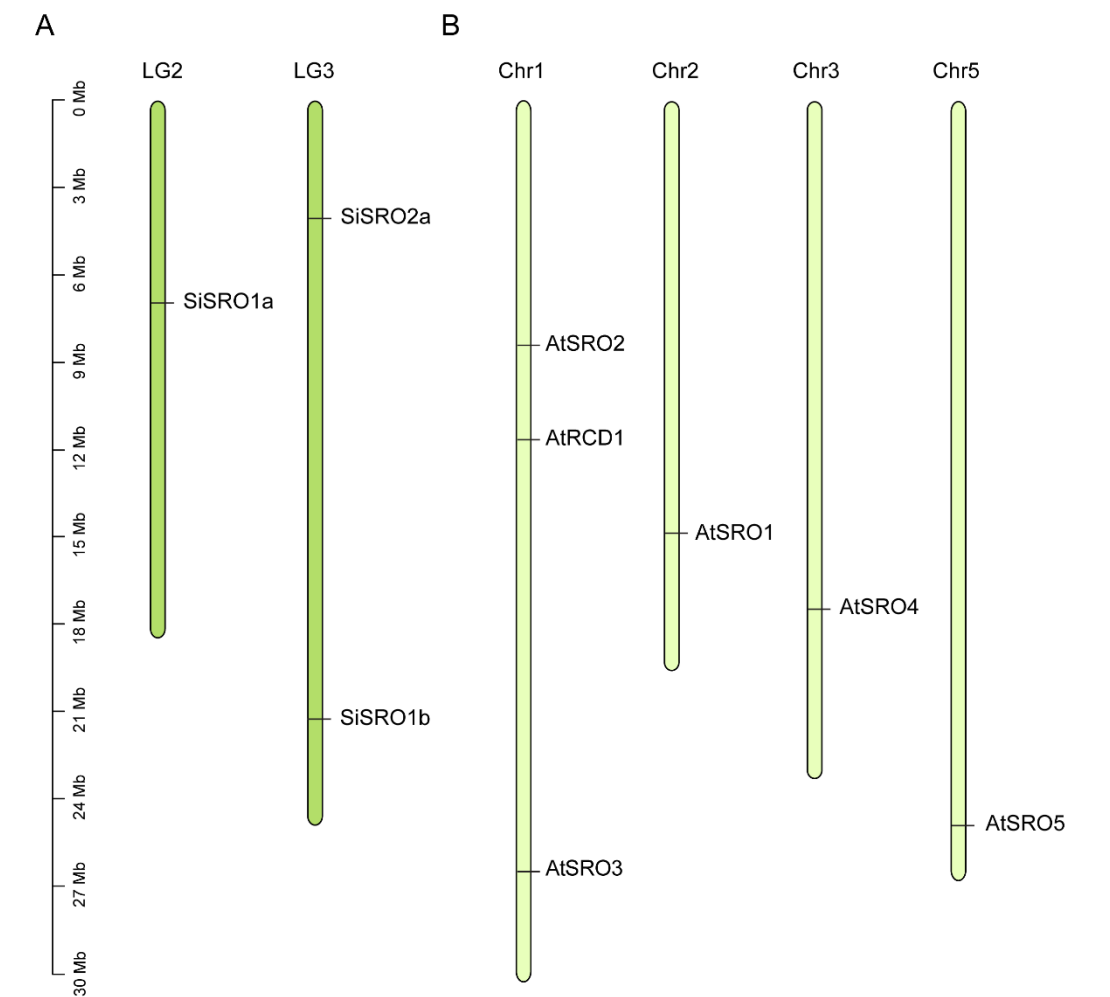

**Figure S1. Distribution of *SRO* genes on sesame linkage groups (A) and *Arabidopsis* chromosomes (B).**

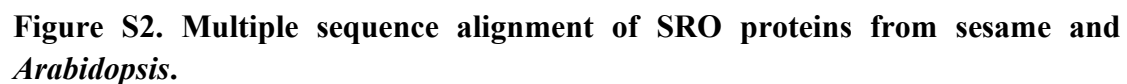

Supplement: s1 [file s1]
