# Supplementary material for: Comprehensive Analysis of SRO Gene Family in Sesamum indicum (L.) Reveals Its Association with Abiotic Stress Responses
Source: Int J Mol Sci. 2021 Dec 2;22(23):13048. doi: 10.3390/ijms222313048 (PMC8657681; doi:10.3390/ijms222313048)
Supplement: Supplementary file 1 [file ijms-22-13048-s001.zip]

Archive with 7 entries (7 files):
- Table S1.xlsx
- Table S2.xlsx
- Table S3.xlsx
- Table S4.xlsx
- Table S5.xlsx
- Table S6.xlsx
- Figures S1 and S2.pdf
