# Supplementary material for: Comprehensive Analysis of SRO Gene Family in Sesamum indicum (L.) Reveals Its Association with Abiotic Stress Responses
Source: Int J Mol Sci. 2021 Dec 2;22(23):13048. doi: 10.3390/ijms222313048 (PMC8657681; doi:10.3390/ijms222313048)
Supplement: Supplementary file 1 [file ijms-22-13048-s001.zip › Table S1.xlsx]

## Sheet: Sheet1
Table S1. List of primers used in this study
Name	Primers sequence
	sense primer (5’->3’)	anti-sense primer (5’->3’)
SiSRO1a-qRT	CCAACTATGCTCTGTTCA	GACTTGTTATTGCTGACTTG
SiSRO1b-qRT	TTGTCTCCTATACGATTG	TTCCTAATATCACTCTACAC
SiSRO2a-qRT	GACTTCAGACTGGATACA	GACTATTATGCTCGGAGA
SiSRO2b-qRT	GCTAATTCAGATTGGATGC	TAGTCACCGTAGTTCTTG
SiH3.3-qRT	GTTGGTCTCTTTGAGGAC	CAGCTGGATGTCTTTTGG
SiSRO2b-FL	CTTGGTACCGAGCTCGGATCCATGTACAGCAAGAAACAAGACTGCG	TGATGGATATCTGCAGAATTCTCAATTTCTTGTGCTTGAACTACCG
