# Supplementary material for: Comprehensive Analysis of SRO Gene Family in Sesamum indicum (L.) Reveals Its Association with Abiotic Stress Responses
Source: Int J Mol Sci. 2021 Dec 2;22(23):13048. doi: 10.3390/ijms222313048 (PMC8657681; doi:10.3390/ijms222313048)
Supplement: Supplementary file 1 [file ijms-22-13048-s001.zip › Table S2.xlsx]

## Sheet: Sheet1
Table S2. SROs in representative plant species
Species	Name	Gene ID	Data source
Arabidopsis thaliana	AtRCD1	At1g32230.1	http://www.arabidopsis.org
	AtSRO1	At2g35510.1
	AtSRO2	At1g23550.1
	AtSRO3	At1g70440.1
	AtSRO4	At3g47720.1
	AtSRO5	At5g62520.1
Glycine max	GmSRO1a	Glyma.09G207200.2	https://phytozome-next.jgi.doe.gov/
	GmSRO1b	Glyma.01G015200.3	Glycine max Wm82.a4.v1
	GmSRO1c	Glyma.01G015000.2
	GmSRO2a	Glyma.08G123000.1
	GmSRO2b	Glyma.05G037700.1
	GmSRO2c	Glyma.17G089400.1
	GmSRO2d	Glyma.04G183100.1
Gossypium raimondii	GrSRO1a	Gorai.004G182400.1	https://phytozome-next.jgi.doe.gov/
	GrSRO1b	Gorai.008G130400.1	Gossypium raimondii v2.1
	GrSRO1c	Gorai.008G224200.1
	GrSRO1d	Gorai.009G278000.1
	GrSRO1e	Gorai.009G224400.1
	GrSRO2a	Gorai.008G158900.1
	GrSRO2b	Gorai.008G295300.1
Oryza sativa subsp. japonica	OsSRO1a	LOC_Os10g42710.1	http://rice.plantbiology.msu.edu/
	OsSRO1b	LOC_Os03g63770.1
	OsSRO1c	LOC_Os03g12820.1
	OsSRO1d	LOC_Os06g13860.1
	OsSRO1e	LOC_Os04g57640.1
Populus trichocarpa	PtSRO1a	Potri.003G096700.10	https://phytozome-next.jgi.doe.gov/
	PtSRO1b	Potri.001G137200.1	Populus trichocarpa v4.1
	PtSRO1c	Potri.002G112300.2
	PtSRO2a	Potri.018G055100.1
	PtSRO2b	Potri.006G231600.1
	PtSRO2c	Potri.006G231100.1
	PtSRO2d	Potri.006G231500.1
	PtSRO2e	Potri.015G076500.1
	PtSRO2f	Potri.012G081100.1
Panicum virgatum	PvSRO1a	Pavir.9NG363200.1	https://phytozome-next.jgi.doe.gov/
	PvSRO1b	Pavir.9KG231800.1	Panicum virgatum v5.1
	PvSRO1c	Pavir.9NG014800.4
	PvSRO1d	Pavir.9KG021200.1
	PvSRO1e	Pavir.7KG382400.5
	PvSRO1f	Pavir.7NG435318.1
	PvSRO1g	Pavir.9KG535900.1
	PvSRO1h	Pavir.9NG774812.1
	PvSRO1i	Pavir.5KG125300.1
	PvSRO1j	Pavir.5NG132500.1
Solanum lycopersicum	SlSRO1a	Solyc08g005270.3.1	https://phytozome-next.jgi.doe.gov/
	SlSRO1b	Solyc08g076420.3.1	Solanum lycopersicum ITAG3.2
	SlSRO1c	Solyc06g066330.3.1
	SlSRO2a	Solyc05g005280.3.1
	SlSRO2b	Solyc03g114360.3.1
Vitis vinifera	VvSRO1a	VIT_202s0012g01920.2	https://phytozome-next.jgi.doe.gov/
	VvSRO1b	VIT_202s0012g01930.3	Vitis vinifera v2.1
	VvSRO1c	VIT_218s0001g08290.4
	VvSRO2a	VIT_201s0127g00680.1
	VvSRO2b	VIT_217s0000g08370.3
Zea mays	ZmSRO1a	Zm00001d030110_T001	https://phytozome-next.jgi.doe.gov/
	ZmSRO1b	Zm00001d014423_T002	Z.mays RefGen_V4
	ZmSRO1c	Zm00001d012821_T003
	ZmSRO1d	Zm00001d047993_T001
	ZmSRO1e	Zm00001d028307_T001
	ZmSRO1f	Zm00001d052295_T024
