# Supplementary material for: Comprehensive Analysis of SRO Gene Family in Sesamum indicum (L.) Reveals Its Association with Abiotic Stress Responses
Source: Int J Mol Sci. 2021 Dec 2;22(23):13048. doi: 10.3390/ijms222313048 (PMC8657681; doi:10.3390/ijms222313048)
Supplement: Supplementary file 1 [file ijms-22-13048-s001.zip › Table S3.xlsx]

## Sheet: Sheet1
Table S3. Description of cis-elements detected in the promoter regions of SiSROs
Cis-acting element	Description
ABRE	abscisic acid responsive element; a cis-acting regulatory element involved in abscisic acid responsiveness
ACE	cis-acting element involved in light responsiveness
AE-box	part of a module for light response
ARE	cis-acting regulatory element essential for the anaerobic induction
AuxRR-core	involved in auxin response du to stress
Box4	part of a conserved DNA module involved in light responsiveness
boxS	elicitation; wounding and pathogen responsiveness
CGTCA-motif	cis-acting regulatory element involved in the MeJA-responsiveness
DRE core	cis-acting regulatory element involved in dehydration,low-temperature,and high-salinity stresses
ERE	ethylene responsive element
G-Box	cis-acting regulatory element involved in light responsiveness
GA-motif	cis-acting regulatory element involved in light responsiveness
GATA-motif	part of a light responsive element
GC-motif	enhancer-like element involved in anoxic specific inducibility
GT1-motif	light responsive element
I-box	light box Element; a cis-acting regulatory element conserved in sequence upstream of light-regulated genes
MBS	MYB binding site involved in drought-inducibility
MRE	MYB binding site involved in light responsiveness
P-box	gibberellin responsive element
Sp1	light responsive element
STRE	stress responsive element
TATC-box	cis-acting element involved in gibberellin-responsiveness
TC-rich repeats	cis-acting element involved in defense and stress responsiveness
TCA-element	cis-acting regulatory element involved in salicylic acid responsiveness
TCT-motif	part of a conserved DNA module involved in light responsiveness
TGA-element	auxin-responsive element
W-box	cis-acting regulatory element found in the promoter of genes involved in defence signalling and response to wounding
WUN-motif	wound-responsive element
WRE3	wound-responsive element
