# Supplementary material for: Comprehensive Analysis of SRO Gene Family in Sesamum indicum (L.) Reveals Its Association with Abiotic Stress Responses
Source: Int J Mol Sci. 2021 Dec 2;22(23):13048. doi: 10.3390/ijms222313048 (PMC8657681; doi:10.3390/ijms222313048)
Supplement: Supplementary file 1 [file ijms-22-13048-s001.zip › Table S4.xlsx]

## Sheet: string_interactions_short
Table S4. The protein interaction relationship in the SRO-mediated interaction network in Erythranthe guttata
#node1	node2	node1_string_id	node2_string_id	neighborhood_on_chromosome	gene_fusion	phylogenetic_cooccurrence	homology	coexpression	experimentally_determined_interaction	database_annotated	automated_textmining	combined_score
Migut.A00014.1.p	Migut.D02566.1.p	4155.Migut.A00014.1.p	4155.Migut.D02566.1.p	0	0	0	0	0	0.167	0	0.318	0.407
Migut.A00014.1.p	Migut.B01342.1.p	4155.Migut.A00014.1.p	4155.Migut.B01342.1.p	0	0	0	0	0	0	0	0.492	0.491
Migut.A00014.1.p	Migut.B01871.1.p	4155.Migut.A00014.1.p	4155.Migut.B01871.1.p	0	0	0	0	0	0	0	0.492	0.491
Migut.A00014.1.p	Migut.K00300.1.p	4155.Migut.A00014.1.p	4155.Migut.K00300.1.p	0	0	0	0	0	0	0	0.492	0.491
Migut.A00014.1.p	Migut.N01485.1.p	4155.Migut.A00014.1.p	4155.Migut.N01485.1.p	0	0	0	0	0	0	0	0.492	0.491
Migut.A00014.1.p	Migut.N02096.1.p	4155.Migut.A00014.1.p	4155.Migut.N02096.1.p	0	0	0	0	0.041	0	0	0.647	0.647
Migut.A00014.1.p	Migut.H02495.1.p	4155.Migut.A00014.1.p	4155.Migut.H02495.1.p	0	0	0	0	0.041	0	0	0.647	0.647
Migut.A00014.1.p	Migut.E01387.1.p	4155.Migut.A00014.1.p	4155.Migut.E01387.1.p	0	0	0	0	0	0	0	0.649	0.649
Migut.A00014.1.p	Migut.H00414.1.p	4155.Migut.A00014.1.p	4155.Migut.H00414.1.p	0	0	0	0	0	0	0	0.705	0.705
Migut.A00014.1.p	Migut.N00926.1.p	4155.Migut.A00014.1.p	4155.Migut.N00926.1.p	0	0	0	0	0.041	0	0	0.769	0.769
Migut.A00014.1.p	Migut.N00626.1.p	4155.Migut.A00014.1.p	4155.Migut.N00626.1.p	0	0	0	0	0	0	0	0.769	0.769
Migut.A00014.1.p	Migut.I00746.1.p	4155.Migut.A00014.1.p	4155.Migut.I00746.1.p	0	0	0	0	0	0	0	0.769	0.769
Migut.A00048.1.p	Migut.D01931.1.p	4155.Migut.A00048.1.p	4155.Migut.D01931.1.p	0	0	0	0	0	0	0	0.547	0.547
Migut.A00048.1.p	Migut.D02566.1.p	4155.Migut.A00048.1.p	4155.Migut.D02566.1.p	0	0	0	0	0	0	0	0.586	0.586
Migut.A00048.1.p	Migut.M00130.1.p	4155.Migut.A00048.1.p	4155.Migut.M00130.1.p	0	0	0	0	0	0	0	0.606	0.606
Migut.A00048.1.p	Migut.F01946.1.p	4155.Migut.A00048.1.p	4155.Migut.F01946.1.p	0	0	0	0	0.064	0	0	0.619	0.628
Migut.A00048.1.p	Migut.F01853.1.p	4155.Migut.A00048.1.p	4155.Migut.F01853.1.p	0	0	0	0	0.05	0.466	0	0.782	0.879
Migut.A00048.1.p	Migut.F01854.1.p	4155.Migut.A00048.1.p	4155.Migut.F01854.1.p	0	0	0	0	0.05	0.466	0	0.782	0.879
Migut.A00048.1.p	Migut.I00117.1.p	4155.Migut.A00048.1.p	4155.Migut.I00117.1.p	0	0	0	0	0.05	0.466	0	0.873	0.929
Migut.A00048.1.p	Migut.L00020.1.p	4155.Migut.A00048.1.p	4155.Migut.L00020.1.p	0	0	0	0	0.053	0.872	0	0.874	0.983
Migut.A00161.1.p	Migut.D01931.1.p	4155.Migut.A00161.1.p	4155.Migut.D01931.1.p	0	0	0	0	0	0.499	0	0	0.499
Migut.A00769.1.p	Migut.N00926.1.p	4155.Migut.A00769.1.p	4155.Migut.N00926.1.p	0	0	0	0	0	0	0	0.507	0.507
Migut.A00769.1.p	Migut.M01503.1.p	4155.Migut.A00769.1.p	4155.Migut.M01503.1.p	0	0	0	0	0	0	0.939	0.067	0.94
Migut.A00769.1.p	Migut.M00130.1.p	4155.Migut.A00769.1.p	4155.Migut.M00130.1.p	0	0	0	0	0	0	0.962	0.067	0.963
Migut.B01342.1.p	Migut.J01231.1.p	4155.Migut.B01342.1.p	4155.Migut.J01231.1.p	0	0	0	0	0	0	0	0.492	0.491
Migut.B01342.1.p	Migut.N00926.1.p	4155.Migut.B01342.1.p	4155.Migut.N00926.1.p	0	0	0	0	0	0	0	0.599	0.599
Migut.B01342.1.p	Migut.N00626.1.p	4155.Migut.B01342.1.p	4155.Migut.N00626.1.p	0	0	0	0	0	0	0	0.599	0.599
Migut.B01871.1.p	Migut.J01231.1.p	4155.Migut.B01871.1.p	4155.Migut.J01231.1.p	0	0	0	0	0	0	0	0.492	0.491
Migut.B01871.1.p	Migut.I00746.1.p	4155.Migut.B01871.1.p	4155.Migut.I00746.1.p	0	0	0	0.912	0.502	0	0	0	0.502
Migut.B01871.1.p	Migut.N00926.1.p	4155.Migut.B01871.1.p	4155.Migut.N00926.1.p	0	0	0	0	0	0	0	0.599	0.599
Migut.B01871.1.p	Migut.N00626.1.p	4155.Migut.B01871.1.p	4155.Migut.N00626.1.p	0	0	0	0	0	0	0	0.599	0.599
Migut.C00497.1.p	Migut.F00629.1.p	4155.Migut.C00497.1.p	4155.Migut.F00629.1.p	0	0	0	0	0	0	0	0.401	0.4
Migut.C00497.1.p	Migut.C01110.1.p	4155.Migut.C00497.1.p	4155.Migut.C01110.1.p	0	0	0	0	0	0	0	0.507	0.507
Migut.C00497.1.p	Migut.D01931.1.p	4155.Migut.C00497.1.p	4155.Migut.D01931.1.p	0	0	0	0	0	0	0	0.631	0.631
Migut.C00497.1.p	Migut.N00926.1.p	4155.Migut.C00497.1.p	4155.Migut.N00926.1.p	0	0	0	0	0	0	0	0.641	0.641
Migut.C00497.1.p	Migut.D00147.1.p	4155.Migut.C00497.1.p	4155.Migut.D00147.1.p	0	0	0	0	0.051	0	0	0.647	0.65
Migut.C00609.1.p	Migut.N00926.1.p	4155.Migut.C00609.1.p	4155.Migut.N00926.1.p	0	0	0	0	0	0	0	0.595	0.595
Migut.C01045.1.p	Migut.D01931.1.p	4155.Migut.C01045.1.p	4155.Migut.D01931.1.p	0	0	0	0	0	0	0	0.448	0.448
Migut.C01045.1.p	Migut.L01610.1.p	4155.Migut.C01045.1.p	4155.Migut.L01610.1.p	0	0	0	0	0	0	0	0.448	0.448
Migut.C01045.1.p	Migut.L00020.1.p	4155.Migut.C01045.1.p	4155.Migut.L00020.1.p	0	0	0	0	0.046	0	0	0.448	0.45
Migut.C01045.1.p	Migut.F01946.1.p	4155.Migut.C01045.1.p	4155.Migut.F01946.1.p	0	0	0	0.698	0.05	0	0.423	0.75	0.556
Migut.C01050.1.p	Migut.L01610.1.p	4155.Migut.C01050.1.p	4155.Migut.L01610.1.p	0	0	0	0	0	0	0	0.448	0.448
Migut.C01050.1.p	Migut.D01931.1.p	4155.Migut.C01050.1.p	4155.Migut.D01931.1.p	0	0	0	0	0	0	0	0.448	0.448
Migut.C01050.1.p	Migut.L00020.1.p	4155.Migut.C01050.1.p	4155.Migut.L00020.1.p	0	0	0	0	0.046	0	0	0.448	0.45
Migut.C01050.1.p	Migut.F01946.1.p	4155.Migut.C01050.1.p	4155.Migut.F01946.1.p	0	0	0	0.738	0.05	0	0.423	0.75	0.539
Migut.C01110.1.p	Migut.N02766.1.p	4155.Migut.C01110.1.p	4155.Migut.N02766.1.p	0	0	0	0	0	0	0	0.507	0.507
Migut.C01110.1.p	Migut.N00926.1.p	4155.Migut.C01110.1.p	4155.Migut.N00926.1.p	0	0	0	0	0	0	0	0.602	0.602
Migut.C01110.1.p	Migut.F00629.1.p	4155.Migut.C01110.1.p	4155.Migut.F00629.1.p	0	0	0	0	0.049	0	0	0.602	0.605
Migut.C01110.1.p	Migut.L00171.1.p	4155.Migut.C01110.1.p	4155.Migut.L00171.1.p	0	0	0	0	0	0	0	0.609	0.609
Migut.C01110.1.p	Migut.H00413.1.p	4155.Migut.C01110.1.p	4155.Migut.H00413.1.p	0	0	0	0	0	0	0	0.609	0.609
Migut.D00147.1.p	Migut.M00727.1.p	4155.Migut.D00147.1.p	4155.Migut.M00727.1.p	0	0	0	0	0.053	0.105	0	0.521	0.558
Migut.D00147.1.p	Migut.D01931.1.p	4155.Migut.D00147.1.p	4155.Migut.D01931.1.p	0	0	0	0	0	0	0	0.633	0.633
Migut.D00147.1.p	Migut.N02766.1.p	4155.Migut.D00147.1.p	4155.Migut.N02766.1.p	0	0	0	0	0.051	0	0	0.647	0.65
Migut.D00147.1.p	Migut.N00926.1.p	4155.Migut.D00147.1.p	4155.Migut.N00926.1.p	0	0	0	0	0	0	0	0.772	0.772
Migut.D00147.1.p	Migut.D00407.1.p	4155.Migut.D00147.1.p	4155.Migut.D00407.1.p	0	0	0	0.814	0.046	0.219	0.962	0.659	0.972
Migut.D00147.1.p	Migut.D02355.1.p	4155.Migut.D00147.1.p	4155.Migut.D02355.1.p	0	0	0	0.623	0	0	0.962	0.929	0.975
Migut.D00407.1.p	Migut.N00926.1.p	4155.Migut.D00407.1.p	4155.Migut.N00926.1.p	0	0	0	0	0	0	0	0.576	0.576
Migut.D00407.1.p	Migut.D02355.1.p	4155.Migut.D00407.1.p	4155.Migut.D02355.1.p	0	0	0	0.804	0	0	0.962	0.874	0.968
Migut.D01931.1.p	Migut.I00645.1.p	4155.Migut.D01931.1.p	4155.Migut.I00645.1.p	0	0	0	0	0	0	0	0.533	0.533
Migut.D01931.1.p	Migut.F01853.1.p	4155.Migut.D01931.1.p	4155.Migut.F01853.1.p	0	0	0	0	0	0	0	0.584	0.584
Migut.D01931.1.p	Migut.F01854.1.p	4155.Migut.D01931.1.p	4155.Migut.F01854.1.p	0	0	0	0	0	0	0	0.584	0.584
Migut.D01931.1.p	Migut.M01503.1.p	4155.Migut.D01931.1.p	4155.Migut.M01503.1.p	0	0	0	0	0	0	0	0.611	0.611
Migut.D01931.1.p	Migut.H00032.1.p	4155.Migut.D01931.1.p	4155.Migut.H00032.1.p	0	0	0	0	0	0	0	0.623	0.623
Migut.D01931.1.p	Migut.N02766.1.p	4155.Migut.D01931.1.p	4155.Migut.N02766.1.p	0	0	0	0	0	0	0	0.631	0.631
Migut.D01931.1.p	Migut.F01946.1.p	4155.Migut.D01931.1.p	4155.Migut.F01946.1.p	0	0	0	0	0	0	0	0.643	0.643
Migut.D01931.1.p	Migut.I00117.1.p	4155.Migut.D01931.1.p	4155.Migut.I00117.1.p	0	0	0	0	0	0	0	0.644	0.644
Migut.D01931.1.p	Migut.K01417.1.p	4155.Migut.D01931.1.p	4155.Migut.K01417.1.p	0	0	0	0	0	0	0	0.664	0.664
Migut.D01931.1.p	Migut.M00130.1.p	4155.Migut.D01931.1.p	4155.Migut.M00130.1.p	0	0	0	0	0	0	0	0.843	0.843
Migut.D01931.1.p	Migut.L01610.1.p	4155.Migut.D01931.1.p	4155.Migut.L01610.1.p	0	0	0	0	0	0	0	0.874	0.874
Migut.D01931.1.p	Migut.L00020.1.p	4155.Migut.D01931.1.p	4155.Migut.L00020.1.p	0	0	0	0	0	0	0	0.875	0.875
Migut.D02355.1.p	Migut.M00727.1.p	4155.Migut.D02355.1.p	4155.Migut.M00727.1.p	0	0	0	0	0.053	0.105	0	0.521	0.558
Migut.D02355.1.p	Migut.N00926.1.p	4155.Migut.D02355.1.p	4155.Migut.N00926.1.p	0	0	0	0	0	0	0	0.576	0.576
Migut.D02566.1.p	Migut.J01231.1.p	4155.Migut.D02566.1.p	4155.Migut.J01231.1.p	0	0	0	0	0	0.167	0	0.318	0.407
Migut.D02566.1.p	Migut.N00626.1.p	4155.Migut.D02566.1.p	4155.Migut.N00626.1.p	0	0	0	0	0	0	0	0.444	0.444
Migut.D02566.1.p	Migut.N00926.1.p	4155.Migut.D02566.1.p	4155.Migut.N00926.1.p	0	0	0	0	0	0	0	0.444	0.444
Migut.D02566.1.p	Migut.I00746.1.p	4155.Migut.D02566.1.p	4155.Migut.I00746.1.p	0	0	0	0	0.054	0	0	0.444	0.451
Migut.D02566.1.p	Migut.E01387.1.p	4155.Migut.D02566.1.p	4155.Migut.E01387.1.p	0	0	0	0	0	0	0	0.587	0.587
Migut.E00570.1.p	Migut.N00926.1.p	4155.Migut.E00570.1.p	4155.Migut.N00926.1.p	0	0	0	0	0	0.238	0	0.71	0.769
Migut.E01387.1.p	Migut.H00414.1.p	4155.Migut.E01387.1.p	4155.Migut.H00414.1.p	0	0	0	0	0.049	0	0	0.628	0.631
Migut.E01387.1.p	Migut.H02495.1.p	4155.Migut.E01387.1.p	4155.Migut.H02495.1.p	0	0	0	0	0	0	0	0.649	0.649
Migut.E01387.1.p	Migut.J01231.1.p	4155.Migut.E01387.1.p	4155.Migut.J01231.1.p	0	0	0	0	0	0	0	0.649	0.649
Migut.E01387.1.p	Migut.N02096.1.p	4155.Migut.E01387.1.p	4155.Migut.N02096.1.p	0	0	0	0	0	0	0	0.649	0.649
Migut.E01387.1.p	Migut.N00626.1.p	4155.Migut.E01387.1.p	4155.Migut.N00626.1.p	0	0	0	0	0	0	0	0.769	0.769
Migut.E01387.1.p	Migut.I00746.1.p	4155.Migut.E01387.1.p	4155.Migut.I00746.1.p	0	0	0	0	0.05	0	0	0.769	0.771
Migut.E01387.1.p	Migut.N00926.1.p	4155.Migut.E01387.1.p	4155.Migut.N00926.1.p	0	0	0	0	0	0.061	0	0.769	0.773
Migut.F00629.1.p	Migut.N02766.1.p	4155.Migut.F00629.1.p	4155.Migut.N02766.1.p	0	0	0	0	0	0	0	0.401	0.4
Migut.F00629.1.p	Migut.N02819.1.p	4155.Migut.F00629.1.p	4155.Migut.N02819.1.p	0	0	0	0	0.055	0	0	0.417	0.425
Migut.F00629.1.p	Migut.L00171.1.p	4155.Migut.F00629.1.p	4155.Migut.L00171.1.p	0	0	0	0	0	0	0	0.522	0.522
Migut.F00629.1.p	Migut.H00413.1.p	4155.Migut.F00629.1.p	4155.Migut.H00413.1.p	0	0	0	0	0	0	0	0.522	0.522
Migut.F00629.1.p	Migut.N00926.1.p	4155.Migut.F00629.1.p	4155.Migut.N00926.1.p	0	0	0	0	0	0.673	0	0.625	0.872
Migut.F01853.1.p	Migut.I00117.1.p	4155.Migut.F01853.1.p	4155.Migut.I00117.1.p	0	0	0	0.904	0.053	0.354	0	0.852	0.413
Migut.F01853.1.p	Migut.M00130.1.p	4155.Migut.F01853.1.p	4155.Migut.M00130.1.p	0	0	0	0	0	0	0	0.615	0.615
Migut.F01853.1.p	Migut.L00020.1.p	4155.Migut.F01853.1.p	4155.Migut.L00020.1.p	0	0	0	0	0	0	0	0.821	0.821
Migut.F01854.1.p	Migut.I00117.1.p	4155.Migut.F01854.1.p	4155.Migut.I00117.1.p	0	0	0	0.798	0.053	0.354	0	0.852	0.471
Migut.F01854.1.p	Migut.M00130.1.p	4155.Migut.F01854.1.p	4155.Migut.M00130.1.p	0	0	0	0	0	0	0	0.615	0.615
Migut.F01854.1.p	Migut.L00020.1.p	4155.Migut.F01854.1.p	4155.Migut.L00020.1.p	0	0	0	0	0	0	0	0.821	0.821
Migut.F01946.1.p	Migut.N02096.1.p	4155.Migut.F01946.1.p	4155.Migut.N02096.1.p	0	0	0	0	0.052	0	0	0.424	0.43
Migut.F01946.1.p	Migut.H02495.1.p	4155.Migut.F01946.1.p	4155.Migut.H02495.1.p	0	0	0	0	0.052	0	0	0.424	0.43
Migut.F01946.1.p	Migut.L01610.1.p	4155.Migut.F01946.1.p	4155.Migut.L01610.1.p	0	0	0	0	0.05	0	0	0.643	0.646
Migut.F01946.1.p	Migut.L00020.1.p	4155.Migut.F01946.1.p	4155.Migut.L00020.1.p	0	0	0	0	0.053	0	0	0.644	0.648
Migut.F02021.1.p	Migut.N02933.1.p	4155.Migut.F02021.1.p	4155.Migut.N02933.1.p	0	0	0	0	0	0	0	0.405	0.405
Migut.F02021.1.p	Migut.N02932.1.p	4155.Migut.F02021.1.p	4155.Migut.N02932.1.p	0	0	0	0	0	0	0	0.405	0.405
Migut.F02021.1.p	Migut.N00926.1.p	4155.Migut.F02021.1.p	4155.Migut.N00926.1.p	0	0	0	0	0	0	0	0.592	0.592
Migut.F02027.1.p	Migut.N02819.1.p	4155.Migut.F02027.1.p	4155.Migut.N02819.1.p	0	0	0	0	0.045	0	0	0.618	0.619
Migut.G01004.1.p	Migut.N00926.1.p	4155.Migut.G01004.1.p	4155.Migut.N00926.1.p	0	0	0	0	0	0.474	0	0.078	0.494
Migut.H00032.1.p	Migut.I00117.1.p	4155.Migut.H00032.1.p	4155.Migut.I00117.1.p	0	0	0	0	0	0.047	0	0.457	0.46
Migut.H00032.1.p	Migut.L00020.1.p	4155.Migut.H00032.1.p	4155.Migut.L00020.1.p	0	0	0	0	0	0	0	0.619	0.619
Migut.H00032.1.p	Migut.M00130.1.p	4155.Migut.H00032.1.p	4155.Migut.M00130.1.p	0	0	0	0	0	0.05	0.1	0.647	0.671
Migut.H00032.1.p	Migut.K01417.1.p	4155.Migut.H00032.1.p	4155.Migut.K01417.1.p	0	0	0	0	0	0	0	0.853	0.853
Migut.H00413.1.p	Migut.I00117.1.p	4155.Migut.H00413.1.p	4155.Migut.I00117.1.p	0	0	0	0	0	0	0	0.584	0.584
Migut.H00413.1.p	Migut.N00926.1.p	4155.Migut.H00413.1.p	4155.Migut.N00926.1.p	0	0	0	0	0	0	0	0.588	0.588
Migut.H00414.1.p	Migut.N02096.1.p	4155.Migut.H00414.1.p	4155.Migut.N02096.1.p	0	0	0	0	0	0	0	0.705	0.705
Migut.H00414.1.p	Migut.J01231.1.p	4155.Migut.H00414.1.p	4155.Migut.J01231.1.p	0	0	0	0	0	0	0	0.705	0.705
Migut.H00414.1.p	Migut.H02495.1.p	4155.Migut.H00414.1.p	4155.Migut.H02495.1.p	0	0	0	0	0	0	0	0.705	0.705
Migut.H00414.1.p	Migut.N00926.1.p	4155.Migut.H00414.1.p	4155.Migut.N00926.1.p	0	0	0	0	0	0	0	0.789	0.789
Migut.H00414.1.p	Migut.I00746.1.p	4155.Migut.H00414.1.p	4155.Migut.I00746.1.p	0	0	0	0	0	0	0	0.789	0.789
Migut.H00414.1.p	Migut.N00626.1.p	4155.Migut.H00414.1.p	4155.Migut.N00626.1.p	0	0	0	0	0	0	0	0.789	0.789
Migut.H02495.1.p	Migut.J01231.1.p	4155.Migut.H02495.1.p	4155.Migut.J01231.1.p	0	0	0	0	0.041	0	0	0.647	0.647
Migut.H02495.1.p	Migut.N00926.1.p	4155.Migut.H02495.1.p	4155.Migut.N00926.1.p	0	0	0	0	0	0	0	0.769	0.769
Migut.H02495.1.p	Migut.N00626.1.p	4155.Migut.H02495.1.p	4155.Migut.N00626.1.p	0	0	0	0	0	0	0	0.769	0.769
Migut.H02495.1.p	Migut.I00746.1.p	4155.Migut.H02495.1.p	4155.Migut.I00746.1.p	0	0	0	0	0	0	0	0.769	0.769
Migut.I00117.1.p	Migut.L00171.1.p	4155.Migut.I00117.1.p	4155.Migut.L00171.1.p	0	0	0	0	0	0	0	0.584	0.584
Migut.I00117.1.p	Migut.M00130.1.p	4155.Migut.I00117.1.p	4155.Migut.M00130.1.p	0	0	0	0	0	0	0	0.619	0.619
Migut.I00117.1.p	Migut.L00020.1.p	4155.Migut.I00117.1.p	4155.Migut.L00020.1.p	0	0	0	0	0	0	0	0.873	0.873
Migut.I00746.1.p	Migut.K00300.1.p	4155.Migut.I00746.1.p	4155.Migut.K00300.1.p	0	0	0	0.932	0.502	0	0	0	0.502
Migut.I00746.1.p	Migut.J01231.1.p	4155.Migut.I00746.1.p	4155.Migut.J01231.1.p	0	0	0	0	0	0	0	0.769	0.769
Migut.I00746.1.p	Migut.N02096.1.p	4155.Migut.I00746.1.p	4155.Migut.N02096.1.p	0	0	0	0	0	0	0	0.769	0.769
Migut.I00746.1.p	Migut.N00626.1.p	4155.Migut.I00746.1.p	4155.Migut.N00626.1.p	0	0	0	0	0	0	0	0.839	0.839
Migut.I00746.1.p	Migut.N00926.1.p	4155.Migut.I00746.1.p	4155.Migut.N00926.1.p	0	0	0	0	0	0	0	0.839	0.839
Migut.J01231.1.p	Migut.K00300.1.p	4155.Migut.J01231.1.p	4155.Migut.K00300.1.p	0	0	0	0	0	0	0	0.492	0.491
Migut.J01231.1.p	Migut.N01485.1.p	4155.Migut.J01231.1.p	4155.Migut.N01485.1.p	0	0	0	0	0	0	0	0.492	0.491
Migut.J01231.1.p	Migut.N02096.1.p	4155.Migut.J01231.1.p	4155.Migut.N02096.1.p	0	0	0	0	0.041	0	0	0.647	0.647
Migut.J01231.1.p	Migut.N00926.1.p	4155.Migut.J01231.1.p	4155.Migut.N00926.1.p	0	0	0	0	0.041	0	0	0.769	0.769
Migut.J01231.1.p	Migut.N00626.1.p	4155.Migut.J01231.1.p	4155.Migut.N00626.1.p	0	0	0	0	0	0	0	0.769	0.769
Migut.K00300.1.p	Migut.N00926.1.p	4155.Migut.K00300.1.p	4155.Migut.N00926.1.p	0	0	0	0	0	0	0	0.599	0.599
Migut.K00300.1.p	Migut.N00626.1.p	4155.Migut.K00300.1.p	4155.Migut.N00626.1.p	0	0	0	0	0	0	0	0.599	0.599
Migut.K00375.1.p	Migut.N00926.1.p	4155.Migut.K00375.1.p	4155.Migut.N00926.1.p	0	0	0	0	0	0.745	0	0.701	0.92
Migut.K01417.1.p	Migut.M00130.1.p	4155.Migut.K01417.1.p	4155.Migut.M00130.1.p	0	0	0	0	0	0	0	0.66	0.66
Migut.L00020.1.p	Migut.M01503.1.p	4155.Migut.L00020.1.p	4155.Migut.M01503.1.p	0	0	0	0	0	0	0	0.4	0.4
Migut.L00020.1.p	Migut.M00130.1.p	4155.Migut.L00020.1.p	4155.Migut.M00130.1.p	0	0	0	0	0	0	0	0.641	0.641
Migut.L00020.1.p	Migut.L01610.1.p	4155.Migut.L00020.1.p	4155.Migut.L01610.1.p	0	0	0	0	0	0	0	0.875	0.875
Migut.L00171.1.p	Migut.N00926.1.p	4155.Migut.L00171.1.p	4155.Migut.N00926.1.p	0	0	0	0	0	0	0	0.588	0.588
Migut.L01610.1.p	Migut.M00727.1.p	4155.Migut.L01610.1.p	4155.Migut.M00727.1.p	0	0	0	0	0	0	0	0.769	0.769
Migut.M00130.1.p	Migut.M01503.1.p	4155.Migut.M00130.1.p	4155.Migut.M01503.1.p	0	0	0.215	0.553	0.099	0	0	0.672	0.415
Migut.M00130.1.p	Migut.N00926.1.p	4155.Migut.M00130.1.p	4155.Migut.N00926.1.p	0	0	0	0	0	0	0	0.507	0.507
Migut.M00727.1.p	Migut.N00926.1.p	4155.Migut.M00727.1.p	4155.Migut.N00926.1.p	0	0	0	0	0	0	0	0.449	0.449
Migut.M01264.1.p	Migut.N02819.1.p	4155.Migut.M01264.1.p	4155.Migut.N02819.1.p	0	0	0	0	0	0	0	0.62	0.62
Migut.N00626.1.p	Migut.N01485.1.p	4155.Migut.N00626.1.p	4155.Migut.N01485.1.p	0	0	0	0	0	0	0	0.599	0.599
Migut.N00626.1.p	Migut.N02096.1.p	4155.Migut.N00626.1.p	4155.Migut.N02096.1.p	0	0	0	0	0	0	0	0.769	0.769
Migut.N00626.1.p	Migut.N00926.1.p	4155.Migut.N00626.1.p	4155.Migut.N00926.1.p	0	0	0	0	0	0	0	0.839	0.839
Migut.N00926.1.p	Migut.N03102.1.p	4155.Migut.N00926.1.p	4155.Migut.N03102.1.p	0	0	0	0	0	0.474	0	0.078	0.494
Migut.N00926.1.p	Migut.N01485.1.p	4155.Migut.N00926.1.p	4155.Migut.N01485.1.p	0	0	0	0	0	0	0	0.599	0.599
Migut.N00926.1.p	Migut.N02766.1.p	4155.Migut.N00926.1.p	4155.Migut.N02766.1.p	0	0	0	0	0	0	0	0.641	0.641
Migut.N00926.1.p	Migut.N02427.1.p	4155.Migut.N00926.1.p	4155.Migut.N02427.1.p	0	0	0	0	0	0.718	0	0	0.718
Migut.N00926.1.p	Migut.N02932.1.p	4155.Migut.N00926.1.p	4155.Migut.N02932.1.p	0	0	0	0	0.041	0.474	0	0.558	0.757
Migut.N00926.1.p	Migut.N02933.1.p	4155.Migut.N00926.1.p	4155.Migut.N02933.1.p	0	0	0	0	0.041	0.474	0	0.558	0.757
Migut.N00926.1.p	Migut.N02096.1.p	4155.Migut.N00926.1.p	4155.Migut.N02096.1.p	0	0	0	0	0	0	0	0.769	0.769
