# Supplementary material for: Comprehensive Analysis of SRO Gene Family in Sesamum indicum (L.) Reveals Its Association with Abiotic Stress Responses
Source: Int J Mol Sci. 2021 Dec 2;22(23):13048. doi: 10.3390/ijms222313048 (PMC8657681; doi:10.3390/ijms222313048)
Supplement: Supplementary file 1 [file ijms-22-13048-s001.zip › Table S5.xlsx]

## Sheet: Sheet1
Table S5. The homologous genes in sesame from the interaction network
Gene ID in Erythranthe guttata	Gene homologs in sesame	Annotation
Migut.N00926.1.p	LOC105155511/SiSRO1a	inactive poly [ADP-ribose] polymerase RCD1
Migut.N02819.1.p	LOC105159067/SiSRO1b	probable inactive poly [ADP-ribose] polymerase SRO3
Migut.D01931.1.p	LOC105179407/SiSRO2b	probable inactive poly [ADP-ribose] polymerase SRO5
Migut.A00014.1.p	LOC105164547	calcium uptake protein, mitochondrial
Migut.A00048.1.p	LOC105164582/SiRDR6	RNA-dependent RNA polymerase 6
Migut.A00161.1.p	LOC105164697	uncharacterized LOC105164697
Migut.A00769.1.p	LOC105164094/SiGSH1	glutamate--cysteine ligase, chloroplastic-like
Migut.B01342.1.p	LOC105168808	clustered mitochondria protein
Migut.B01871.1.p	LOC105173663	protein TSS
Migut.C00497.1.p	LOC105159118/SiTAF4B	transcription initiation factor TFIID subunit 4b
Migut.C00609.1.p	LOC105166227/SiMIZ1	protein MIZU-KUSSEI 1
Migut.C01045.1.p	LOC105179849/SiGTA2	putative transcription elongation factor SPT5 homolog 1
Migut.C01110.1.p	LOC105155242/SiATAF1	NAC domain-containing protein 2
Migut.D02355.1.p	LOC105170007/SiPARP3	poly [ADP-ribose] polymerase 3
Migut.D02566.1.p	LOC105170198/SiDEK1	calpain-type cysteine protease DEK1
Migut.E00570.1.p	LOC105156156/SiSOS1	sodium/hydrogen exchanger 8
Migut.E01387.1.p	LOC105158401	pentatricopeptide repeat-containing protein At4g19440, chloroplastic
Migut.F00629.1.p	LOC105167013/SiDREB2A	dehydration-responsive element-binding protein 2C-like
Migut.F01853.1.p	LOC105166873/SiDCL2	endoribonuclease Dicer homolog 2
Migut.F02021.1.p	LOC105161136/SiRRL	sporulation protein RMD1
Migut.F02027.1.p	LOC105161144	salt stress-induced hydrophobic peptide ESI3
Migut.G01004.1.p	LOC105172018/SiSTO	B-box zinc finger protein 24
Migut.H00032.1.p	LOC105179873/SiRABB1b	ras-related protein RABB1b
Migut.H00413.1.p	LOC105176219/SiAP2	floral homeotic protein APETALA 2-like
Migut.H00414.1.p	LOC105176220	OTU domain-containing protein 3
Migut.H02495.1.p	LOC105165742/SiCRH1	protein MICRORCHIDIA 2-like
Migut.I00117.1.p	LOC105157122/SiDCL1	endoribonuclease Dicer homolog 1
Migut.I00645.1.p	LOC105158508	uncharacterized LOC105158508
Migut.I00746.1.p	LOC105162893/SiREC2	protein TSS
Migut.J01231.1.p	LOC105166421	calcium uptake protein, mitochondrial
Migut.K00375.1.p	LOC105162277/SiNAC079	NAC domain-containing protein 92
Migut.K01417.1.p	LOC105176304	pentatricopeptide repeat-containing protein At4g35850, mitochondrial
Migut.L00020.1.p	LOC105179065/SiSGS3	protein SUPPRESSOR OF GENE SILENCING 3
Migut.L01610.1.p	LOC105161977	uncharacterized LOC105161977
Migut.M00130.1.p	LOC105157020/SiP5CDH	probable aldehyde dehydrogenase
Migut.M00727.1.p	LOC105176934	polynucleotide 3'-phosphatase ZDP
Migut.M01264.1.p	LOC105175388/SiPSBQ	oxygen-evolving enhancer protein 3, chloroplastic
Migut.M01503.1.p	LOC105175117	succinate-semialdehyde dehydrogenase, mitochondrial
Migut.N00626.1.p	LOC105177114	GPI transamidase component PIG-S
Migut.N02096.1.p	LOC105157241/SiDMS11	protein MICRORCHIDIA 6
Migut.N02427.1.p	LOC105170985	protein AIR2
Migut.N02932.1.p	LOC105158915/SiNAC017	NAC domain-containing protein 17-like
Migut.N02933.1.p	LOC105158914/SiNAC016	NAC domain-containing protein 17-like
