# Supplementary material for: Comprehensive Analysis of SRO Gene Family in Sesamum indicum (L.) Reveals Its Association with Abiotic Stress Responses
Source: Int J Mol Sci. 2021 Dec 2;22(23):13048. doi: 10.3390/ijms222313048 (PMC8657681; doi:10.3390/ijms222313048)
Supplement: Supplementary file 1 [file ijms-22-13048-s001.zip › Table S6.xlsx]

## Sheet: Sheet1
Table S6. List of genes co-expressed with SiSRO2a or SiSRO2b
Bait gene	Gene ID	MR	annotations
SiSRO2a	LOC105177008	2	E3 ubiquitin-protein ligase RMA1H1-like
SiSRO2a	LOC105171718	2.44949	ethylene-responsive transcription factor ERF096
SiSRO2a	LOC105155570	3.4641	agamous-like MADS-box protein AGL104
SiSRO2a	LOC105174592	5	pyruvate decarboxylase 1
SiSRO2a	LOC105178381	6.245	uncharacterized LOC105178381
SiSRO2a	LOC105162213	6.48074	berberine bridge enzyme-like 18
SiSRO2a	LOC105162086	6.63325	rop guanine nucleotide exchange factor 9
SiSRO2a	LOC105168907	7.48331	probable linoleate 9S-lipoxygenase 5
SiSRO2a	LOC105169831	7.48331	uncharacterized LOC105169831
SiSRO2a	LOC105157007	7.74597	uncharacterized LOC105157007
SiSRO2a	LOC105171553	7.74597	pectinesterase-like
SiSRO2a	LOC105162558	8.48528	thiosulfate sulfurtransferase 18
SiSRO2a	LOC105175969	9.48683	microsomal glutathione S-transferase 3
SiSRO2a	LOC105157667	9.79796	uncharacterized LOC105157667
SiSRO2a	LOC105172871	11.225	UPF0496 protein At4g34320-like
SiSRO2a	LOC105157140	12.49	two-component response regulator ARR5
SiSRO2a	LOC105167017	13.0384	cytosolic endo-beta-N-acetylglucosaminidase 1-like
SiSRO2a	LOC105164556	13.2665	heparanase-like protein 3
SiSRO2a	LOC105166189	14.1421	probable calcium-binding protein CML41
SiSRO2a	LOC105155589	15.0997	alcohol dehydrogenase 3
SiSRO2a	LOC105155847	16.3095	putative glucuronosyltransferase PGSIP8
SiSRO2a	LOC105160313	16.4317	oligopeptide transporter 6
SiSRO2a	LOC105155705	17.3205	peroxidase 16
SiSRO2a	LOC105158488	17.4929	protein NUCLEAR FUSION DEFECTIVE 4-like
SiSRO2a	LOC105177943	18.8944	LOB domain-containing protein 41
SiSRO2a	LOC105175178	19.8997	organic cation/carnitine transporter 3-like
SiSRO2a	LOC105165381	19.975	E3 ubiquitin-protein ligase RMA1H1-like
SiSRO2a	LOC105165103	20.8567	probable receptor-like protein kinase At1g49730
SiSRO2a	LOC105171585	20.9045	basic 7S globulin-like
SiSRO2a	LOC105156327	20.9762	homeobox-leucine zipper protein HOX3
SiSRO2a	LOC105156206	21.0713	nudix hydrolase 17, mitochondrial
SiSRO2a	LOC105173918	22.3607	plant cysteine oxidase 1
SiSRO2a	LOC105163446	24.1247	exocyst complex component EXO84B-like
SiSRO2a	LOC105176762	24.2487	mitogen-activated protein kinase kinase kinase NPK1-like
SiSRO2a	LOC105173804	25.4558	uncharacterized LOC105173804
SiSRO2a	LOC105169695	25.8844	GATA transcription factor 5-like
SiSRO2a	LOC105173571	26.9815	ATP-dependent 6-phosphofructokinase 6
SiSRO2a	LOC105173607	27.4591	1-aminocyclopropane-1-carboxylate oxidase 1
SiSRO2a	LOC105177288	28.9828	chorismate mutase 1, chloroplastic-like
SiSRO2a	LOC105155260	30.1993	probable LRR receptor-like serine/threonine-protein kinase At1g56130
SiSRO2a	LOC105177841	30.7409	ACT domain-containing protein ACR1
SiSRO2a	LOC105166268	30.9839	transcription factor HEC2-like
SiSRO2a	LOC105158383	31.305	uncharacterized LOC105158383
SiSRO2a	LOC105156738	31.5278	protein NIM1-INTERACTING 2-like
SiSRO2a	LOC105163975	31.749	uncharacterized LOC105163975
SiSRO2a	LOC105163211	31.9844	receptor-like cytosolic serine/threonine-protein kinase RBK2
SiSRO2a	LOC105177399	31.9844	kelch repeat-containing protein At3g27220
SiSRO2a	LOC105155701	33.3167	ribulose bisphosphate carboxylase small chain, chloroplastic-like
SiSRO2a	LOC105169569	33.7639	uncharacterized LOC105169569
SiSRO2a	LOC105174253	34.4674	cytochrome P450 704C1
SiSRO2a	LOC105157577	34.8999	F-box/kelch-repeat protein At1g80440-like
SiSRO2a	LOC105161185	35.9166	probable leucine-rich repeat receptor-like protein kinase At5g49770
SiSRO2a	LOC105164401	36.3731	soluble inorganic pyrophosphatase 1-like
SiSRO2a	LOC105173552	37.7624	hexokinase-1
SiSRO2a	LOC105174719	38.1707	uncharacterized LOC105174719
SiSRO2a	LOC105178039	41.5692	amino-acid permease BAT1 homolog
SiSRO2a	LOC105169420	41.8927	putative 12-oxophytodienoate reductase 11
SiSRO2a	LOC105160423	42.2493	probable WRKY transcription factor 27
SiSRO2a	LOC105171727	42.4735	major allergen Pru ar 1-like
SiSRO2a	LOC105163865	42.7434	CBL-interacting serine/threonine-protein kinase 11-like
SiSRO2a	LOC105178962	45.9565	uncharacterized LOC105178962
SiSRO2a	LOC105175476	46	sugar carrier protein C-like
SiSRO2a	LOC105159122	46.2601	acyl-CoA-binding domain-containing protein 3
SiSRO2a	LOC105174841	47.0532	septum-promoting GTP-binding protein 1
SiSRO2a	LOC105162814	47.8957	probable aquaporin SIP2-1
SiSRO2a	LOC105167472	48.4355	protein JINGUBANG
SiSRO2a	LOC105161315	48.7442	uncharacterized LOC105161315
SiSRO2a	LOC105177966	48.8365	G-box-binding factor 1
SiSRO2a	LOC105172967	49.5681	protein NUCLEAR FUSION DEFECTIVE 4-like
SiSRO2a	LOC105159097	50.1996	exocyst complex component EXO70A1-like
SiSRO2a	LOC105170815	50.6656	dolichol kinase EVAN
SiSRO2a	LOC105163655	51.4393	F-box protein At4g18380
SiSRO2a	LOC105175153	52.2303	uncharacterized LOC105175153
SiSRO2a	LOC105155536	52.45	probable S-adenosylmethionine-dependent methyltransferase At5g37990
SiSRO2a	LOC105160937	52.4595	mitochondrial substrate carrier family protein B-like
SiSRO2a	LOC105161716	52.6213	E3 ubiquitin-protein ligase PUB23
SiSRO2a	LOC105157215	53.9166	mitogen-activated protein kinase kinase 3
SiSRO2a	LOC105163044	54.074	bZIP transcription factor 53
SiSRO2a	LOC105158316	56.0892	late embryogenesis abundant protein 6
SiSRO2a	LOC105165965	56.3915	probable prolyl 4-hydroxylase 3
SiSRO2a	LOC105162514	56.4447	protein ABHD18
SiSRO2a	LOC105174138	56.7803	uncharacterized LOC105174138
SiSRO2a	LOC105171879	56.7891	receptor like protein kinase S.2
SiSRO2a	LOC105162916	57.4456	1-aminocyclopropane-1-carboxylate oxidase 5-like
SiSRO2a	LOC105172599	57.463	early nodulin-93-like
SiSRO2a	LOC105175451	57.9828	vesicle-associated protein 4-2
SiSRO2a	LOC110013074	58.2838	uncharacterized LOC110013074
SiSRO2a	LOC105175619	60.8687	pyruvate decarboxylase 1
SiSRO2a	LOC105170954	61.4248	cysteine proteinase inhibitor A-like
SiSRO2a	LOC105172523	65.0385	phosphoribosylamine--glycine ligase, chloroplastic
SiSRO2a	LOC105160519	65.2993	protein DETOXIFICATION 49
SiSRO2a	LOC105165227	65.3452	universal stress protein PHOS34
SiSRO2a	LOC105165825	66.9925	epidermis-specific secreted glycoprotein EP1-like
SiSRO2a	LOC105171904	68.5857	CASP-like protein PIMP1
SiSRO2a	LOC105174232	70.4557	protein DMR6-LIKE OXYGENASE 1
SiSRO2a	LOC105179515	71.5192	threonine dehydratase biosynthetic, chloroplastic-like
SiSRO2a	LOC105178058	71.624	histone deacetylase 19
SiSRO2a	LOC105174827	71.7356	pectinesterase 2.1-like
SiSRO2a	LOC105174890	71.9375	uncharacterized LOC105174890
SiSRO2a	LOC105162748	74.458	dirigent protein 23-like
SiSRO2a	LOC105173842	74.9533	shikimate O-hydroxycinnamoyltransferase-like
SiSRO2a	LOC105173891	75.8947	uncharacterized LOC105173891
SiSRO2a	LOC105175664	76.4853	myb-related protein 330
SiSRO2a	LOC105160947	78.8353	zinc finger protein CONSTANS-LIKE 16
SiSRO2a	LOC105156820	79.3851	probable protein phosphatase 2C 49
SiSRO2a	LOC105173722	79.7684	sucrose synthase
SiSRO2a	LOC105163005	79.8999	probable protein phosphatase 2C 49
SiSRO2a	LOC105163668	82.1219	hexokinase-1
SiSRO2a	LOC105173105	83.1384	uncharacterized LOC105173105
SiSRO2a	LOC105167760	83.666	potassium channel SKOR-like
SiSRO2a	LOC105167417	84.4275	uncharacterized LOC105167417
SiSRO2a	LOC105163098	86.4639	ethylene-responsive transcription factor ERF071
SiSRO2a	LOC105177769	86.5332	uncharacterized LOC105177769
SiSRO2a	LOC105169212	89.8888	probable inactive receptor kinase At2g26730
SiSRO2a	LOC105174265	90.6422	mannan synthase 1-like
SiSRO2a	LOC105155434	92.2876	dof zinc finger protein DOF1.2
SiSRO2a	LOC105169821	93.3381	serine/threonine-protein kinase STY46
SiSRO2a	LOC105160566	95.3677	cytochrome P450 704C1
SiSRO2a	LOC105176659	96.0937	uncharacterized LOC105176659
SiSRO2a	LOC105163104	96.1249	epoxide hydrolase A
SiSRO2a	LOC105179844	96.3431	alcohol dehydrogenase 3
SiSRO2a	LOC105155204	96.6851	CASP-like protein PIMP1
SiSRO2a	LOC105160251	96.871	F-box protein At5g07610-like
SiSRO2a	LOC105169213	99.2975	early nodulin-93
SiSRO2a	LOC105164575	101.069	uncharacterized LOC105164575
SiSRO2a	LOC105163346	101.632	proline-rich protein 3
SiSRO2a	LOC105171258	101.853	monothiol glutaredoxin-S2-like
SiSRO2a	LOC105162085	103.402	aspartate aminotransferase, cytoplasmic
SiSRO2a	LOC105176669	103.909	fluoride export protein 2
SiSRO2a	LOC105174705	107.149	uncharacterized LOC105174705
SiSRO2a	LOC110011408	107.569	uncharacterized LOC110011408
SiSRO2a	LOC105164234	113.855	protein LURP-one-related 11-like
SiSRO2a	LOC105176284	115.412	peptidyl serine alpha-galactosyltransferase-like
SiSRO2a	LOC105162214	116.525	berberine bridge enzyme-like 18
SiSRO2a	LOC105179368	117.58	high-affinity nitrate transporter 3.1-like
SiSRO2a	LOC105155648	124	EG45-like domain containing protein
SiSRO2a	LOC105157021	124.403	probable WRKY transcription factor 72
SiSRO2a	LOC105158919	125.092	laccase-15-like
SiSRO2a	LOC105164677	127.491	abscisic acid receptor PYL2
SiSRO2a	LOC105175473	128.86	uncharacterized LOC105175473
SiSRO2a	LOC105159835	130.111	uncharacterized LOC105159835
SiSRO2a	LOC105176697	130.996	cytochrome P450 716B1
SiSRO2a	LOC105177224	132.575	polyvinylalcohol dehydrogenase
SiSRO2a	LOC105156877	132.996	pectinesterase-like
SiSRO2a	LOC105163060	133.761	uncharacterized LOC105163060
SiSRO2a	LOC105175904	133.795	haloacid dehalogenase-like hydrolase domain-containing protein 3
SiSRO2a	LOC105173830	135.322	serine/threonine-protein kinase RIPK
SiSRO2a	LOC105163366	136.345	BI1-like protein
SiSRO2a	LOC105177393	136.455	lysine histidine transporter 1
SiSRO2a	LOC105177811	136.916	BTB/POZ and TAZ domain-containing protein 4
SiSRO2a	LOC105167406	137.405	acetyl-CoA acetyltransferase, cytosolic 1-like
SiSRO2a	LOC105177842	138.13	protein PHLOEM PROTEIN 2-LIKE A10
SiSRO2a	LOC105171070	143.555	PRELI domain containing protein 3A-like
SiSRO2a	LOC105174878	144.416	probable protein phosphatase 2C 2
SiSRO2a	LOC105179407	144.876	probable inactive poly [ADP-ribose] polymerase SRO5
SiSRO2a	LOC105172687	145.307	probable indole-3-acetic acid-amido synthetase GH3.1
SiSRO2a	LOC105165374	148.149	MLO-like protein 11
SiSRO2a	LOC105174286	148.492	uncharacterized LOC105174286
SiSRO2a	LOC105159057	149.332	phosphoenolpyruvate carboxykinase (ATP)
SiSRO2a	LOC105179523	151.05	pyruvate kinase 1, cytosolic
SiSRO2a	LOC105168572	155.897	uncharacterized LOC105168572
SiSRO2a	LOC105174169	157.242	SEC12-like protein 1
SiSRO2a	LOC105165086	159.198	cytochrome P450 714C2
SiSRO2a	LOC105170739	160.15	high affinity nitrate transporter 2.4
SiSRO2a	LOC105164776	161.972	two-on-two hemoglobin-3
SiSRO2a	LOC105168952	162.665	universal stress protein A-like protein
SiSRO2a	LOC105175864	166.151	protein PHLOEM PROTEIN 2-LIKE A9
SiSRO2a	LOC105178902	166.361	uncharacterized LOC105178902
SiSRO2a	LOC105162880	166.763	UDP-glucuronate 4-epimerase 1
SiSRO2a	LOC105163071	168.345	uncharacterized LOC105163071
SiSRO2a	LOC105173877	174.069	defensin-like protein 1
SiSRO2a	LOC105176565	179.9	uridine kinase-like protein 3
SiSRO2a	LOC105163244	180.4	transcription factor bHLH66-like
SiSRO2a	LOC105170416	180.624	probable serine/threonine-protein kinase PBL19
SiSRO2a	LOC105176292	181.248	F-box protein At3g07870-like
SiSRO2a	LOC105160004	181.962	uncharacterized LOC105160004
SiSRO2a	LOC105155178	182.093	probable LRR receptor-like serine/threonine-protein kinase At1g56140
SiSRO2a	LOC105155484	183.281	probable E3 ubiquitin-protein ligase RHG1A
SiSRO2a	LOC105164784	184.824	potassium channel KAT3
SiSRO2a	LOC105155542	186.558	uncharacterized LOC105155542
SiSRO2a	LOC105171790	186.989	major allergen Pru ar 1-like
SiSRO2a	LOC105168590	188.865	uncharacterized LOC105168590
SiSRO2a	LOC105174783	190.499	putative cyclin-D6-1
SiSRO2a	LOC105171791	195.4	major allergen Pru ar 1-like
SiSRO2a	LOC105176714	196.102	protein disulfide isomerase-like 5-4
SiSRO2a	LOC105177265	197.75	polypyrimidine tract-binding protein homolog 1
SiSRO2a	LOC105166654	199.76	uncharacterized LOC105166654
SiSRO2a	LOC105157117	200.245	thioredoxin-like 1-2, chloroplastic
SiSRO2a	LOC105167673	201.194	probable pectate lyase P59
SiSRO2a	LOC105178600	201.256	geraniol synthase, chloroplastic-like
SiSRO2a	LOC105169693	202.069	squalene synthase-like
SiSRO2a	LOC105172646	203.568	squalene monooxygenase-like
SiSRO2a	LOC105169255	204.612	bifunctional riboflavin biosynthesis protein RIBA 1, chloroplastic-like
SiSRO2a	LOC105155211	205.815	probable LRR receptor-like serine/threonine-protein kinase At1g56140
SiSRO2a	LOC105159421	208.062	stearoyl-[acyl-carrier-protein] 9-desaturase 6, chloroplastic
SiSRO2a	LOC105173606	208.943	transcription factor KUA1-like
SiSRO2a	LOC105165960	213.448	uncharacterized protein At1g76070
SiSRO2a	LOC105162952	216.686	zinc finger protein 2-like
SiSRO2a	LOC105169996	218.979	cytochrome P450 94C1
SiSRO2a	LOC105159228	224	cytochrome P450 734A1
SiSRO2a	LOC105156658	225.526	protein JINGUBANG
SiSRO2a	LOC105165762	232.873	uncharacterized LOC105165762
SiSRO2a	LOC105164702	233.897	phospholipid-transporting ATPase 2
SiSRO2a	LOC105157365	234.504	pentatricopeptide repeat-containing protein At2g22410, mitochondrial-like
SiSRO2a	LOC105165024	235.33	flotillin-like protein 4
SiSRO2a	LOC105177977	236.347	transcription repressor OFP7
SiSRO2a	LOC105177838	237.436	uncharacterized LOC105177838
SiSRO2a	LOC105166205	237.992	glucan endo-1,3-beta-glucosidase, acidic-like
SiSRO2a	LOC105168953	238.206	GTP-binding protein SAR1A
SiSRO2a	LOC105158446	239.445	cation/H(+) antiporter 18
SiSRO2a	LOC105159053	240.4	CBL-interacting serine/threonine-protein kinase 8
SiSRO2a	LOC105172670	241.433	zinc finger protein AZF2-like
SiSRO2a	LOC105172664	242.771	uncharacterized LOC105172664
SiSRO2a	LOC105166629	244.066	serine/threonine-protein kinase EDR1
SiSRO2a	LOC105155956	244.115	expansin-like B1
SiSRO2a	LOC105176252	244.371	F-box/kelch-repeat protein At3g27150-like
SiSRO2a	LOC105164663	246.495	IQ domain-containing protein IQM1
SiSRO2a	LOC105155834	250.855	BUD13 homolog
SiSRO2a	LOC105175564	253.442	ethylene-responsive transcription factor 4-like
SiSRO2a	LOC105162536	254.24	guanylate kinase 2-like
SiSRO2a	LOC105168680	256.476	probable WRKY transcription factor 75
SiSRO2a	LOC105172342	256.583	uncharacterized GPI-anchored protein At3g06035
SiSRO2a	LOC105155884	256.679	glutamate receptor 2.9-like
SiSRO2a	LOC105171328	261.977	uncharacterized N-acetyltransferase p20-like
SiSRO2a	LOC105175475	263.249	uncharacterized LOC105175475
SiSRO2a	LOC105155824	264.292	probable trehalose-phosphate phosphatase F
SiSRO2a	LOC105164393	264.617	uncharacterized LOC105164393
SiSRO2a	LOC105163923	265.682	probable WRKY transcription factor 25
SiSRO2a	LOC105169567	265.801	polyadenylate-binding protein RBP47
SiSRO2a	LOC105167474	267.371	wall-associated receptor kinase-like 14
SiSRO2a	LOC105176306	267.395	GDSL esterase/lipase At5g14450
SiSRO2a	LOC105158248	271.601	uncharacterized LOC105158248
SiSRO2a	LOC105170465	271.851	trans-cinnamate 4-monooxygenase-like
SiSRO2a	LOC105173768	273.262	probable LRR receptor-like serine/threonine-protein kinase At3g47570
SiSRO2a	LOC105165238	273.92	potassium transporter 5
SiSRO2a	LOC105168032	277.409	inositol transporter 4
SiSRO2a	LOC105179272	278.812	beta-fructofuranosidase, soluble isoenzyme I-like
SiSRO2a	LOC105155443	281.06	uncharacterized LOC105155443
SiSRO2a	LOC105155533	285.3	leucine-rich repeat extensin-like protein 1
SiSRO2a	LOC105166390	286.998	plant intracellular Ras-group-related LRR protein 5
SiSRO2a	LOC105161362	287.406	heavy metal-associated isoprenylated plant protein 3
SiSRO2a	LOC105174780	287.566	uncharacterized LOC105174780
SiSRO2a	LOC105168143	287.733	non-specific phospholipase C3
SiSRO2a	LOC105156559	288.375	protein STRICTOSIDINE SYNTHASE-LIKE 12-like
SiSRO2a	LOC105159321	291.127	phosphomevalonate kinase, peroxisomal
SiSRO2a	LOC105175608	293.523	uncharacterized LOC105175608
SiSRO2a	LOC105175452	296.944	sugar carrier protein C-like
SiSRO2a	LOC105155585	297.893	uncharacterized LOC105155585
SiSRO2a	LOC105177798	301.138	uncharacterized LOC105177798
SiSRO2a	LOC110012680	303.074	endochitinase EP3-like
SiSRO2a	LOC105163546	303.421	FT-interacting protein 1-like
SiSRO2a	LOC105179201	303.645	ethylene-responsive transcription factor ERF107
SiSRO2a	LOC105166933	304.624	S-norcoclaurine synthase-like
SiSRO2a	LOC105158443	307.417	uncharacterized protein At4g14450, chloroplastic
SiSRO2a	LOC105155864	311.063	uncharacterized LOC105155864
SiSRO2a	LOC105175605	311.48	uncharacterized LOC105175605
SiSRO2a	LOC105172339	313.457	putative F-box protein PP2-B12
SiSRO2a	LOC105171942	314.474	uncharacterized LOC105171942
SiSRO2a	LOC105170464	316.89	trans-cinnamate 4-monooxygenase
SiSRO2a	LOC105167341	317.736	U-box domain-containing protein 17-like
SiSRO2a	LOC105161286	317.969	AP2/ERF and B3 domain-containing transcription factor RAV1-like
SiSRO2a	LOC105176086	318.085	NAC domain-containing protein 2
SiSRO2a	LOC105173765	318.424	beta-glucosidase 12-like
SiSRO2a	LOC105175220	319.828	farnesyl pyrophosphate synthase 1
SiSRO2a	LOC105176778	320.037	uncharacterized LOC105176778
SiSRO2a	LOC105161592	323.265	uncharacterized LOC105161592
SiSRO2a	LOC105179658	324.708	eIF-2-alpha kinase GCN2
SiSRO2a	LOC105170231	325.678	phylloplanin-like
SiSRO2a	LOC105159601	325.699	uncharacterized LOC105159601
SiSRO2a	LOC105155904	330.899	protein RADIALIS-like 4
SiSRO2a	LOC105177425	331.3	sulfite oxidase-like
SiSRO2a	LOC105177839	333.587	uncharacterized LOC105177839
SiSRO2a	LOC105178705	344.354	transcription factor JUNGBRUNNEN 1
SiSRO2a	LOC105168404	344.738	flavonoid 3',5'-methyltransferase-like
SiSRO2a	LOC105158939	345.123	random slug protein 5
SiSRO2a	LOC105166070	347.491	aldehyde oxidase GLOX
SiSRO2a	LOC105159177	349.216	uncharacterized LOC105159177
SiSRO2a	LOC105169793	353.435	squalene monooxygenase-like
SiSRO2a	LOC105170794	353.463	pleiotropic drug resistance protein 2-like
SiSRO2a	LOC105178377	355.367	alkane hydroxylase MAH1-like
SiSRO2a	LOC105171389	355.992	basic 7S globulin-like
SiSRO2a	LOC105155312	356.23	diphosphomevalonate decarboxylase MVD2, peroxisomal-like
SiSRO2a	LOC105166541	357.994	diphosphomevalonate decarboxylase MVD1, peroxisomal-like
SiSRO2a	LOC105168265	358.128	pantothenate kinase 1
SiSRO2a	LOC105175438	362.254	G-type lectin S-receptor-like serine/threonine-protein kinase At1g11330
SiSRO2a	LOC105176050	362.491	protein PLANT CADMIUM RESISTANCE 6
SiSRO2a	LOC105175906	364.988	phosphatidate cytidylyltransferase, mitochondrial
SiSRO2a	LOC105175912	366.528	vacuolar-sorting receptor 6
SiSRO2a	LOC105166484	366.775	transcription factor bHLH128
SiSRO2a	LOC105161321	368.231	probable acetyltransferase NATA1-like
SiSRO2a	LOC105156609	375.157	uncharacterized LOC105156609
SiSRO2a	LOC105170413	376.534	probable serine/threonine-protein kinase PBL10
SiSRO2a	LOC105167016	377.734	DEAD-box ATP-dependent RNA helicase 18
SiSRO2a	LOC105156075	378.923	metal tolerance protein 1
SiSRO2a	LOC105164616	384.825	E3 ubiquitin ligase PQT3-like
SiSRO2a	LOC105173826	385.373	mechanosensitive ion channel protein 10-like
SiSRO2a	LOC105158784	385.38	probable leucine-rich repeat receptor-like protein kinase At1g35710
SiSRO2a	LOC105174041	385.545	caffeoylshikimate esterase-like
SiSRO2a	LOC105169834	391.659	lysine histidine transporter-like 8
SiSRO2a	LOC105173633	391.895	IQ domain-containing protein IQM1-like
SiSRO2a	LOC105157443	395.635	uncharacterized LOC105157443
SiSRO2a	LOC105175646	396.232	uncharacterized LOC105175646
SiSRO2a	LOC105158915	398.04	NAC domain-containing protein 17-like
SiSRO2a	LOC105157950	399.237	LON peptidase N-terminal domain and RING finger protein 1
SiSRO2a	LOC105173482	399.485	transcription factor bHLH130-like
SiSRO2a	LOC105167728	400.78	nudix hydrolase 18, mitochondrial-like
SiSRO2a	LOC105158311	404.158	probable WRKY transcription factor 40
SiSRO2a	LOC105159251	404.702	gamma carbonic anhydrase 1, mitochondrial
SiSRO2a	LOC105175513	407.284	helicase-like transcription factor CHR28
SiSRO2a	LOC105165861	409.805	mitogen-activated protein kinase kinase 9
SiSRO2a	LOC105178134	412.941	histone H1
SiSRO2a	LOC105162062	413.502	sugar transport protein 14
SiSRO2a	LOC105175219	419.011	C2 and GRAM domain-containing protein At1g03370
SiSRO2a	LOC105171455	420.012	sugar transporter ERD6-like 16
SiSRO2a	LOC105176612	421.036	premnaspirodiene oxygenase-like
SiSRO2a	LOC105175167	421.924	disease resistance protein RPM1-like
SiSRO2a	LOC105163783	425.253	uncharacterized LOC105163783
SiSRO2a	LOC105169945	426.279	E3 ubiquitin-protein ligase MIEL1
SiSRO2a	LOC105159048	427.036	oligopeptide transporter 4
SiSRO2a	LOC105175624	430.386	protein trichome birefringence-like 38
SiSRO2a	LOC105179961	431.385	MACPF domain-containing protein CAD1
SiSRO2a	LOC105163552	435.875	uncharacterized LOC105163552
SiSRO2a	LOC105171999	437.824	protein NLP9
SiSRO2a	LOC105166912	438.269	dihydropyrimidine dehydrogenase (NADP(+)), chloroplastic
SiSRO2a	LOC105156220	438.281	lignin-forming anionic peroxidase
SiSRO2a	LOC105174213	440.02	putative F-box protein At4g38870
SiSRO2a	LOC105165530	445.164	pentatricopeptide repeat-containing protein At3g14580, mitochondrial
SiSRO2a	LOC105175834	446.552	beta-amyrin 28-oxidase
SiSRO2a	LOC105158579	449.711	60S ribosomal protein L23A-like
SiSRO2a	LOC105174043	450.093	auxin-induced protein X15
SiSRO2a	LOC105156461	453.678	phosphatidylinositol 4-kinase gamma 5
SiSRO2a	LOC105169685	455.5	B-box zinc finger protein 20
SiSRO2a	LOC105166787	455.895	two-component response regulator-like APRR5
SiSRO2a	LOC105178081	457.313	mitogen-activated protein kinase kinase kinase 3-like
SiSRO2a	LOC105176924	459.864	uncharacterized LOC105176924
SiSRO2a	LOC105160635	465.253	hexose carrier protein HEX6
SiSRO2a	LOC105178924	466.089	major allergen Mal d 1-like
SiSRO2a	LOC105170616	466.102	probable E3 ubiquitin-protein ligase RHC1A
SiSRO2a	LOC105174335	467.75	uncharacterized LOC105174335
SiSRO2a	LOC105180099	471.254	diphosphomevalonate decarboxylase MVD2, peroxisomal-like
SiSRO2a	LOC105159249	472.955	protein RADIALIS-like 3
SiSRO2a	LOC105176246	474.726	mitochondrial import receptor subunit TOM20
SiSRO2a	LOC105178102	475.92	uncharacterized LOC105178102
SiSRO2a	LOC105168927	477.968	uncharacterized LOC105168927
SiSRO2a	LOC105162569	480.062	probable calcium-binding protein CML36
SiSRO2a	LOC105176145	480.362	LEAF RUST 10 DISEASE-RESISTANCE LOCUS RECEPTOR-LIKE PROTEIN KINASE-like 1.4
SiSRO2a	LOC110012469	480.487	probable LRR receptor-like serine/threonine-protein kinase At5g16900
SiSRO2a	LOC105157383	482.089	alpha-galactosidase
SiSRO2a	LOC105161896	486.549	threonine synthase 1, chloroplastic
SiSRO2a	LOC105174256	494.482	ACT domain-containing protein ACR10
SiSRO2a	LOC105173665	494.748	UDP-glucuronic acid decarboxylase 6-like
SiSRO2a	LOC105164955	495.81	AIG2-like protein D
SiSRO2a	LOC105156414	496.697	AP2/ERF and B3 domain-containing transcription factor RAV1-like
SiSRO2a	LOC105155573	496.854	uncharacterized LOC105155573
SiSRO2b	LOC105155956	2.82843	expansin-like B1
SiSRO2b	LOC105163366	3.4641	BI1-like protein
SiSRO2b	LOC105172670	3.87298	zinc finger protein AZF2-like
SiSRO2b	LOC105178102	9.16515	uncharacterized LOC105178102
SiSRO2b	LOC105163098	9.53939	ethylene-responsive transcription factor ERF071
SiSRO2b	LOC105155204	12.2474	CASP-like protein PIMP1
SiSRO2b	LOC105179961	12.3288	MACPF domain-containing protein CAD1
SiSRO2b	LOC105174286	15.2971	uncharacterized LOC105174286
SiSRO2b	LOC105165227	18	universal stress protein PHOS34
SiSRO2b	LOC105168953	18.3303	GTP-binding protein SAR1A
SiSRO2b	LOC105175864	20.8567	protein PHLOEM PROTEIN 2-LIKE A9
SiSRO2b	LOC105159057	24.8998	phosphoenolpyruvate carboxykinase (ATP)
SiSRO2b	LOC105171904	25.04	CASP-like protein PIMP1
SiSRO2b	LOC105173891	25.3969	uncharacterized LOC105173891
SiSRO2b	LOC105172339	25.7876	putative F-box protein PP2-B12
SiSRO2b	LOC105177838	30.4631	uncharacterized LOC105177838
SiSRO2b	LOC105173804	31.225	uncharacterized LOC105173804
SiSRO2b	LOC105160635	33.9116	hexose carrier protein HEX6
SiSRO2b	LOC105168404	35.0999	flavonoid 3',5'-methyltransferase-like
SiSRO2b	LOC105169420	35.9444	putative 12-oxophytodienoate reductase 11
SiSRO2b	LOC105162814	37.55	probable aquaporin SIP2-1
SiSRO2b	LOC105174138	37.9473	uncharacterized LOC105174138
SiSRO2b	LOC105160566	39.4968	cytochrome P450 704C1
SiSRO2b	LOC105174780	39.8372	uncharacterized LOC105174780
SiSRO2b	LOC105163211	42.7434	receptor-like cytosolic serine/threonine-protein kinase RBK2
SiSRO2b	LOC105162514	43.0116	protein ABHD18
SiSRO2b	LOC105168143	43.2435	non-specific phospholipase C3
SiSRO2b	LOC105176659	43.8748	uncharacterized LOC105176659
SiSRO2b	LOC110011408	44.1814	uncharacterized LOC110011408
SiSRO2b	LOC105165762	45.7275	uncharacterized LOC105165762
SiSRO2b	LOC105168927	45.8912	uncharacterized LOC105168927
SiSRO2b	LOC105169569	48.9081	uncharacterized LOC105169569
SiSRO2b	LOC105169255	49.0204	bifunctional riboflavin biosynthesis protein RIBA 1, chloroplastic-like
SiSRO2b	LOC105160251	49.5984	F-box protein At5g07610-like
SiSRO2b	LOC105175969	49.9199	microsomal glutathione S-transferase 3
SiSRO2b	LOC105165965	51.614	probable prolyl 4-hydroxylase 3
SiSRO2b	LOC105165825	52.3068	epidermis-specific secreted glycoprotein EP1-like
SiSRO2b	LOC105173918	54.2679	plant cysteine oxidase 1
SiSRO2b	LOC105175178	54.8635	organic cation/carnitine transporter 3-like
SiSRO2b	LOC105157365	55.4797	pentatricopeptide repeat-containing protein At2g22410, mitochondrial-like
SiSRO2b	LOC105174232	55.857	protein DMR6-LIKE OXYGENASE 1
SiSRO2b	LOC105164776	55.9196	two-on-two hemoglobin-3
SiSRO2b	LOC105175153	58.0172	uncharacterized LOC105175153
SiSRO2b	LOC105171727	58.2409	major allergen Pru ar 1-like
SiSRO2b	LOC105165103	58.4466	probable receptor-like protein kinase At1g49730
SiSRO2b	LOC105169817	59.925	hippocampus abundant transcript 1 protein
SiSRO2b	LOC105168952	60.3324	universal stress protein A-like protein
SiSRO2b	LOC105177943	60.7124	LOB domain-containing protein 41
SiSRO2b	LOC105158939	61.7981	random slug protein 5
SiSRO2b	LOC105177393	62.1048	lysine histidine transporter 1
SiSRO2b	LOC105169821	63.7103	serine/threonine-protein kinase STY46
SiSRO2b	LOC105158311	64.7379	probable WRKY transcription factor 40
SiSRO2b	LOC105171585	65.4217	basic 7S globulin-like
SiSRO2b	LOC105178039	66.4078	amino-acid permease BAT1 homolog
SiSRO2b	LOC105157215	66.4831	mitogen-activated protein kinase kinase 3
SiSRO2b	LOC105166189	67.4981	probable calcium-binding protein CML41
SiSRO2b	LOC105162558	68.5857	thiosulfate sulfurtransferase 18
SiSRO2b	LOC105166831	70.6965	S-norcoclaurine synthase-like
SiSRO2b	LOC105155824	70.9295	probable trehalose-phosphate phosphatase F
SiSRO2b	LOC105177841	70.993	ACT domain-containing protein ACR1
SiSRO2b	LOC105172417	73.4847	chromodomain-helicase-DNA-binding protein 4
SiSRO2b	LOC105175619	74.2832	pyruvate decarboxylase 1
SiSRO2b	LOC105166541	74.6994	diphosphomevalonate decarboxylase MVD1, peroxisomal-like
SiSRO2b	LOC105175451	79	vesicle-associated protein 4-2
SiSRO2b	LOC105158915	79.2023	NAC domain-containing protein 17-like
SiSRO2b	LOC105156327	79.9375	homeobox-leucine zipper protein HOX3
SiSRO2b	LOC105175608	80.9938	uncharacterized LOC105175608
SiSRO2b	LOC105156820	81.0555	probable protein phosphatase 2C 49
SiSRO2b	LOC105157994	83.7138	uncharacterized LOC105157994
SiSRO2b	LOC105166654	83.9643	uncharacterized LOC105166654
SiSRO2b	LOC105174841	84.6818	septum-promoting GTP-binding protein 1
SiSRO2b	LOC105171942	84.7467	uncharacterized LOC105171942
SiSRO2b	LOC105175664	84.8175	myb-related protein 330
SiSRO2b	LOC105180099	85.0118	diphosphomevalonate decarboxylase MVD2, peroxisomal-like
SiSRO2b	LOC105168907	85.5336	probable linoleate 9S-lipoxygenase 5
SiSRO2b	LOC105155312	86.1626	diphosphomevalonate decarboxylase MVD2, peroxisomal-like
SiSRO2b	LOC105169567	86.3134	polyadenylate-binding protein RBP47
SiSRO2b	LOC105161362	86.487	heavy metal-associated isoprenylated plant protein 3
SiSRO2b	LOC105159122	86.5852	acyl-CoA-binding domain-containing protein 3
SiSRO2b	LOC105167931	87.7268	F-box protein At1g61340
SiSRO2b	LOC105155589	87.7496	alcohol dehydrogenase 3
SiSRO2b	LOC105159053	88.5381	CBL-interacting serine/threonine-protein kinase 8
SiSRO2b	LOC105164234	89.0955	protein LURP-one-related 11-like
SiSRO2b	LOC105169213	89.3252	early nodulin-93
SiSRO2b	LOC105171879	89.37	receptor like protein kinase S.2
SiSRO2b	LOC105173830	89.7329	serine/threonine-protein kinase RIPK
SiSRO2b	LOC105172342	90.111	uncharacterized GPI-anchored protein At3g06035
SiSRO2b	LOC105171070	91.3564	PRELI domain containing protein 3A-like
SiSRO2b	LOC105155573	93.1987	uncharacterized LOC105155573
SiSRO2b	LOC105155211	94.2497	probable LRR receptor-like serine/threonine-protein kinase At1g56140
SiSRO2b	LOC105178381	94.2974	uncharacterized LOC105178381
SiSRO2b	LOC105170954	95	cysteine proteinase inhibitor A-like
SiSRO2b	LOC105177399	95.1157	kelch repeat-containing protein At3g27220
SiSRO2b	LOC105175476	96.871	sugar carrier protein C-like
SiSRO2b	LOC105175904	98.1784	haloacid dehalogenase-like hydrolase domain-containing protein 3
SiSRO2b	LOC105170465	98.3158	trans-cinnamate 4-monooxygenase-like
SiSRO2b	LOC105163399	98.4987	1-aminocyclopropane-1-carboxylate oxidase homolog 1-like
SiSRO2b	LOC105162551	99.6795	heat stress transcription factor B-3-like
SiSRO2b	LOC105171775	99.97	putative E3 ubiquitin-protein ligase XBAT35
SiSRO2b	LOC105164393	100.399	uncharacterized LOC105164393
SiSRO2b	LOC105163244	103.421	transcription factor bHLH66-like
SiSRO2b	LOC105160937	104.192	mitochondrial substrate carrier family protein B-like
SiSRO2b	LOC105177220	104.881	plant cysteine oxidase 2
SiSRO2b	LOC105164556	105.157	heparanase-like protein 3
SiSRO2b	LOC105167406	106.057	acetyl-CoA acetyltransferase, cytosolic 1-like
SiSRO2b	LOC105162880	106.141	UDP-glucuronate 4-epimerase 1
SiSRO2b	LOC105174592	108.444	pyruvate decarboxylase 1
SiSRO2b	LOC105169693	108.83	squalene synthase-like
SiSRO2b	LOC105157007	108.885	uncharacterized LOC105157007
SiSRO2b	LOC105179844	109.398	alcohol dehydrogenase 3
SiSRO2b	LOC105162085	109.982	aspartate aminotransferase, cytoplasmic
SiSRO2b	LOC105168590	112.65	uncharacterized LOC105168590
SiSRO2b	LOC105155570	114.446	agamous-like MADS-box protein AGL104
SiSRO2b	LOC105175565	115.1	MACPF domain-containing protein NSL1
SiSRO2b	LOC105177798	115.724	uncharacterized LOC105177798
SiSRO2b	LOC105176714	118.659	protein disulfide isomerase-like 5-4
SiSRO2b	LOC105167450	119.029	uncharacterized LOC105167450
SiSRO2b	LOC105176565	120.913	uridine kinase-like protein 3
SiSRO2b	LOC105155585	121.869	uncharacterized LOC105155585
SiSRO2b	LOC105161315	122.593	uncharacterized LOC105161315
SiSRO2b	LOC105177425	122.829	sulfite oxidase-like
SiSRO2b	LOC105176762	122.906	mitogen-activated protein kinase kinase kinase NPK1-like
SiSRO2b	LOC105161185	123.248	probable leucine-rich repeat receptor-like protein kinase At5g49770
SiSRO2b	LOC105155847	123.386	putative glucuronosyltransferase PGSIP8
SiSRO2b	LOC105171506	123.73	flowering-promoting factor 1-like protein 3
SiSRO2b	LOC105178058	123.839	histone deacetylase 19
SiSRO2b	LOC105174827	124.451	pectinesterase 2.1-like
SiSRO2b	LOC105169793	124.579	squalene monooxygenase-like
SiSRO2b	LOC105162213	125.746	berberine bridge enzyme-like 18
SiSRO2b	LOC105158488	125.857	protein NUCLEAR FUSION DEFECTIVE 4-like
SiSRO2b	LOC105158316	126.392	late embryogenesis abundant protein 6
SiSRO2b	LOC105159321	127.937	phosphomevalonate kinase, peroxisomal
SiSRO2b	LOC105155701	128.187	ribulose bisphosphate carboxylase small chain, chloroplastic-like
SiSRO2b	LOC105162863	130.399	alanine aminotransferase 2-like
SiSRO2b	LOC105162952	134.313	zinc finger protein 2-like
SiSRO2b	LOC105175637	134.952	aureusidin synthase
SiSRO2b	LOC105177008	135.499	E3 ubiquitin-protein ligase RMA1H1-like
SiSRO2b	LOC105169996	136.132	cytochrome P450 94C1
SiSRO2b	LOC105166268	140	transcription factor HEC2-like
SiSRO2b	LOC105156372	140.125	transcription factor MYB62
SiSRO2b	LOC105170616	140.798	probable E3 ubiquitin-protein ligase RHC1A
SiSRO2b	LOC105165442	140.833	epidermis-specific secreted glycoprotein EP1-like
SiSRO2b	LOC105178023	141.308	uncharacterized LOC105178023
SiSRO2b	LOC105178876	143.248	probable prefoldin subunit 3
SiSRO2b	LOC105176306	143.965	GDSL esterase/lipase At5g14450
SiSRO2b	LOC105157214	144.876	probable inactive poly [ADP-ribose] polymerase SRO5
SiSRO2b	LOC105169779	145.19	actin-depolymerizing factor 5
SiSRO2b	LOC105169797	145.3	SKP1-like protein 1A
SiSRO2b	LOC105175834	145.554	beta-amyrin 28-oxidase
SiSRO2b	LOC105173552	145.633	hexokinase-1
SiSRO2b	LOC105172599	146.192	early nodulin-93-like
SiSRO2b	LOC105157667	146.424	uncharacterized LOC105157667
SiSRO2b	LOC105157577	147.377	F-box/kelch-repeat protein At1g80440-like
SiSRO2b	LOC105166912	147.784	dihydropyrimidine dehydrogenase (NADP(+)), chloroplastic
SiSRO2b	LOC105161658	147.797	uncharacterized LOC105161658
SiSRO2b	LOC105163655	150.599	F-box protein At4g18380
SiSRO2b	LOC105159601	151.017	uncharacterized LOC105159601
SiSRO2b	LOC105176246	151.136	mitochondrial import receptor subunit TOM20
SiSRO2b	LOC105162569	151.443	probable calcium-binding protein CML36
SiSRO2b	LOC105158383	152.676	uncharacterized LOC105158383
SiSRO2b	LOC105174890	152.804	uncharacterized LOC105174890
SiSRO2b	LOC105169831	153.734	uncharacterized LOC105169831
SiSRO2b	LOC105176145	153.916	LEAF RUST 10 DISEASE-RESISTANCE LOCUS RECEPTOR-LIKE PROTEIN KINASE-like 1.4
SiSRO2b	LOC105167760	154.389	potassium channel SKOR-like
SiSRO2b	LOC105156461	154.609	phosphatidylinositol 4-kinase gamma 5
SiSRO2b	LOC105162214	155.827	berberine bridge enzyme-like 18
SiSRO2b	LOC105173607	155.849	1-aminocyclopropane-1-carboxylate oxidase 1
SiSRO2b	LOC105155864	156.461	uncharacterized LOC105155864
SiSRO2b	LOC105165381	156.509	E3 ubiquitin-protein ligase RMA1H1-like
SiSRO2b	LOC105155536	157.105	probable S-adenosylmethionine-dependent methyltransferase At5g37990
SiSRO2b	LOC105177515	157.864
SiSRO2b	LOC105155648	158.499	EG45-like domain containing protein
SiSRO2b	LOC105158443	159.198	uncharacterized protein At4g14450, chloroplastic
SiSRO2b	LOC105172871	161.338	UPF0496 protein At4g34320-like
SiSRO2b	LOC105156877	161.75	pectinesterase-like
SiSRO2b	LOC105169212	162.481	probable inactive receptor kinase At2g26730
SiSRO2b	LOC105155767	165.027	zinc finger A20 and AN1 domain-containing stress-associated protein 1
SiSRO2b	LOC105173633	165.569	IQ domain-containing protein IQM1-like
SiSRO2b	LOC105171718	166.102	ethylene-responsive transcription factor ERF096
SiSRO2b	LOC105173722	166.958	sucrose synthase
SiSRO2b	LOC105165960	167.601	uncharacterized protein At1g76070
SiSRO2b	LOC105171553	169.411	pectinesterase-like
SiSRO2b	LOC105159835	170.763	uncharacterized LOC105159835
SiSRO2b	LOC105179326	173.586	ethylene-responsive transcription factor ABR1-like
SiSRO2b	LOC105168265	174.419	pantothenate kinase 1
SiSRO2b	LOC105179523	175	pyruvate kinase 1, cytosolic
SiSRO2b	LOC105156609	175.186	uncharacterized LOC105156609
SiSRO2b	LOC105169998	177.482	uncharacterized LOC105169998
SiSRO2b	LOC105176470	178.871	uncharacterized protein PB18E9.04c
SiSRO2b	LOC105175220	180	farnesyl pyrophosphate synthase 1
SiSRO2b	LOC105156049	180.144	methionine gamma-lyase
SiSRO2b	LOC105174213	181.959	putative F-box protein At4g38870
SiSRO2b	LOC105164702	182.445	phospholipid-transporting ATPase 2
SiSRO2b	LOC105163044	183.019	bZIP transcription factor 53
SiSRO2b	LOC105155705	187.662	peroxidase 16
SiSRO2b	LOC105177966	188.319	G-box-binding factor 1
SiSRO2b	LOC105173842	190.526	shikimate O-hydroxycinnamoyltransferase-like
SiSRO2b	LOC105171791	193.773	major allergen Pru ar 1-like
SiSRO2b	LOC105156206	195.1	nudix hydrolase 17, mitochondrial
SiSRO2b	LOC105174719	196.392	uncharacterized LOC105174719
SiSRO2b	LOC105157092	196.632	uncharacterized endoplasmic reticulum membrane protein C16E8.02
SiSRO2b	LOC105177811	197.985	BTB/POZ and TAZ domain-containing protein 4
SiSRO2b	LOC105171188	198.464	probable trehalose-phosphate phosphatase J
SiSRO2b	LOC105178902	199.449	uncharacterized LOC105178902
SiSRO2b	LOC105162086	200.771	rop guanine nucleotide exchange factor 9
SiSRO2b	LOC105160519	201.201	protein DETOXIFICATION 49
SiSRO2b	LOC105159421	201.425	stearoyl-[acyl-carrier-protein] 9-desaturase 6, chloroplastic
SiSRO2b	LOC105156559	201.906	protein STRICTOSIDINE SYNTHASE-LIKE 12-like
SiSRO2b	LOC105163054	203.128	universal stress protein A-like protein
SiSRO2b	LOC105171389	204.154	basic 7S globulin-like
SiSRO2b	LOC105161648	207.839	ASC1-like protein
SiSRO2b	LOC105161592	208.768	uncharacterized LOC105161592
SiSRO2b	LOC105164727	209.141	lachrymatory-factor synthase-like
SiSRO2b	LOC105168406	209.657	flavonoid 3',5'-methyltransferase-like
SiSRO2b	LOC105178962	209.771	uncharacterized LOC105178962
SiSRO2b	LOC105159097	209.957	exocyst complex component EXO70A1-like
SiSRO2b	LOC105177288	211.733	chorismate mutase 1, chloroplastic-like
SiSRO2b	LOC105177769	214.749	uncharacterized LOC105177769
SiSRO2b	LOC110013074	216.125	uncharacterized LOC110013074
SiSRO2b	LOC105163975	217.927	uncharacterized LOC105163975
SiSRO2b	LOC105161716	217.991	E3 ubiquitin-protein ligase PUB23
SiSRO2b	LOC105161835	218.609	uncharacterized LOC105161835
SiSRO2b	LOC105178134	218.778	histone H1
SiSRO2b	LOC105175618	221.251	uncharacterized LOC105175618
SiSRO2b	LOC105163865	221.269	CBL-interacting serine/threonine-protein kinase 11-like
SiSRO2b	LOC105171710	221.705	ethylene-responsive transcription factor 1B
SiSRO2b	LOC105169695	224.245	GATA transcription factor 5-like
SiSRO2b	LOC105167341	229.22	U-box domain-containing protein 17-like
SiSRO2b	LOC105177941	230.313	uncharacterized LOC105177941
SiSRO2b	LOC105170673	231.499	uncharacterized LOC105170673
SiSRO2b	LOC105170231	231.754	phylloplanin-like
SiSRO2b	LOC105176697	232.981	cytochrome P450 716B1
SiSRO2b	LOC110011709	234.947	uncharacterized mitochondrial protein AtMg00810-like
SiSRO2b	LOC105165819	238.277	uncharacterized LOC105165819
SiSRO2b	LOC105174256	238.348	ACT domain-containing protein ACR10
SiSRO2b	LOC105167474	238.897	wall-associated receptor kinase-like 14
SiSRO2b	LOC105175473	239.165	uncharacterized LOC105175473
SiSRO2b	LOC105178924	240.595	major allergen Mal d 1-like
SiSRO2b	LOC105179515	241.384	threonine dehydratase biosynthetic, chloroplastic-like
SiSRO2b	LOC105163821	243.857	cytochrome P450 714C2
SiSRO2b	LOC105157455	247.629	F-box protein PP2-A12
SiSRO2b	LOC105157140	248.869	two-component response regulator ARR5
SiSRO2b	LOC105160676	253.626	GDSL esterase/lipase At4g10955-like
SiSRO2b	LOC105177977	255.734	transcription repressor OFP7
SiSRO2b	LOC105161828	256.496	vacuolar protein sorting-associated protein 32 homolog 2-like
SiSRO2b	LOC105175272	259.756	putative 12-oxophytodienoate reductase 11
SiSRO2b	LOC105174205	261.025	aluminum-activated malate transporter 8-like
SiSRO2b	LOC105155260	262.277	probable LRR receptor-like serine/threonine-protein kinase At1g56130
SiSRO2b	LOC105167022	264.443	inactive receptor-like serine/threonine-protein kinase At2g40270
SiSRO2b	LOC105176146	264.915	protein NtpR
SiSRO2b	LOC105158919	267.415	laccase-15-like
SiSRO2b	LOC105168680	269.75	probable WRKY transcription factor 75
SiSRO2b	LOC105172523	270.954	phosphoribosylamine--glycine ligase, chloroplastic
SiSRO2b	LOC105161273	273.993	elicitor-responsive protein 1
SiSRO2b	LOC105178343	275.336	uncharacterized LOC105178343
SiSRO2b	LOC105171455	276.507	sugar transporter ERD6-like 16
SiSRO2b	LOC105167417	277.942	uncharacterized LOC105167417
SiSRO2b	LOC105170666	278.28	uncharacterized LOC105170666
SiSRO2b	LOC105175452	278.772	sugar carrier protein C-like
SiSRO2b	LOC105160848	279.843	abscisic acid receptor PYL4
SiSRO2b	LOC105177873	280.598	glycine-rich domain-containing protein 1-like
SiSRO2b	LOC105165086	281.217	cytochrome P450 714C2
SiSRO2b	LOC105166977	283.898	uncharacterized LOC105166977
SiSRO2b	LOC105163446	284.099	exocyst complex component EXO84B-like
SiSRO2b	LOC105169834	284.174	lysine histidine transporter-like 8
SiSRO2b	LOC105166484	285.14	transcription factor bHLH128
SiSRO2b	LOC105175906	285.545	phosphatidate cytidylyltransferase, mitochondrial
SiSRO2b	LOC105170416	285.815	probable serine/threonine-protein kinase PBL19
SiSRO2b	LOC105155533	288.617	leucine-rich repeat extensin-like protein 1
SiSRO2b	LOC105175219	289.413	C2 and GRAM domain-containing protein At1g03370
SiSRO2b	LOC105177735	290.107	calcium uniporter protein 2, mitochondrial-like
SiSRO2b	LOC105166076	291.709	probable 1-acylglycerol-3-phosphate O-acyltransferase
SiSRO2b	LOC105158958	291.966	nudC domain-containing protein 2
SiSRO2b	LOC105164784	291.978	potassium channel KAT3
SiSRO2b	LOC105164330	293.721	putative glucuronosyltransferase PGSIP8
SiSRO2b	LOC105164616	293.957	E3 ubiquitin ligase PQT3-like
SiSRO2b	LOC105162194	295.252	branched-chain-amino-acid aminotransferase 2, chloroplastic
SiSRO2b	LOC105175475	296.864	uncharacterized LOC105175475
SiSRO2b	LOC105157021	297.308	probable WRKY transcription factor 72
SiSRO2b	LOC105167998	299.074	probable WRKY transcription factor 31
SiSRO2b	LOC105174335	301.993	uncharacterized LOC105174335
SiSRO2b	LOC105159250	304.467	uncharacterized LOC105159250
SiSRO2b	LOC105166416	307.851	uncharacterized LOC105166416
SiSRO2b	LOC105174578	310.632	acyl-coenzyme A oxidase 4, peroxisomal
SiSRO2b	LOC105175751	312.151	CBL-interacting protein kinase 23
SiSRO2b	LOC105178057	314.506	E3 ubiquitin-protein ligase RGLG3
SiSRO2b	LOC105175624	315.167	protein trichome birefringence-like 38
SiSRO2b	LOC105171681	317.44	ethylene receptor 2
SiSRO2b	LOC105162178	318.707	allene oxide cyclase, chloroplastic
SiSRO2b	LOC105162122	320.411	EIN3-binding F-box protein 1-like
SiSRO2b	LOC105170547	320.562	cyclin-C1-2
SiSRO2b	LOC105165085	320.78	VQ motif-containing protein 31-like
SiSRO2b	LOC105177657	325.003	protein DETOXIFICATION 54
SiSRO2b	LOC105155217	325.893	stem-specific protein TSJT1-like
SiSRO2b	LOC105165523	326.435	gibberellin 2-beta-dioxygenase 1-like
SiSRO2b	LOC105175582	326.533	glutaredoxin-C9-like
SiSRO2b	LOC105174872	327.994	uncharacterized LOC105174872
SiSRO2b	LOC105159530	331.264	transmembrane protein 45B
SiSRO2b	LOC105169863	333.219	probable serine/threonine-protein kinase PIX13
SiSRO2b	LOC105156215	333.994	protein PLANT CADMIUM RESISTANCE 2-like
SiSRO2b	LOC105169885	338.127	scopoletin glucosyltransferase-like
SiSRO2b	LOC105167014	338.336	abscisic acid receptor PYL4-like
SiSRO2b	LOC105155904	338.821	protein RADIALIS-like 4
SiSRO2b	LOC105175627	339.491	U-box domain-containing protein 4-like
SiSRO2b	LOC105176893	344.039	probable glutathione S-transferase
SiSRO2b	LOC105162916	344.791	1-aminocyclopropane-1-carboxylate oxidase 5-like
SiSRO2b	LOC105174043	345.916	auxin-induced protein X15
SiSRO2b	LOC105167016	345.932	DEAD-box ATP-dependent RNA helicase 18
SiSRO2b	LOC105159228	346.583	cytochrome P450 734A1
SiSRO2b	LOC105176924	347.721	uncharacterized LOC105176924
SiSRO2b	LOC105166339	349.6	signal recognition particle receptor subunit alpha homolog
SiSRO2b	LOC105173665	352.64	UDP-glucuronic acid decarboxylase 6-like
SiSRO2b	LOC105178600	355.571	geraniol synthase, chloroplastic-like
SiSRO2b	LOC105159177	355.978	uncharacterized LOC105159177
SiSRO2b	LOC105163700	355.989	uncharacterized LOC105163700
SiSRO2b	LOC105166390	356.317	plant intracellular Ras-group-related LRR protein 5
SiSRO2b	LOC105168162	356.798	probable xyloglucan endotransglucosylase/hydrolase protein 30
SiSRO2b	LOC105155484	359.28	probable E3 ubiquitin-protein ligase RHG1A
SiSRO2b	LOC105172186	359.944	trihelix transcription factor ASIL2-like
SiSRO2b	LOC105166629	362.138	serine/threonine-protein kinase EDR1
SiSRO2b	LOC105175593	362.5	pathogenesis-related genes transcriptional activator PTI5-like
SiSRO2b	LOC105176799	365.569	diacylglycerol O-acyltransferase 2D
SiSRO2b	LOC105176284	366.873	peptidyl serine alpha-galactosyltransferase-like
SiSRO2b	LOC105161286	367.274	AP2/ERF and B3 domain-containing transcription factor RAV1-like
SiSRO2b	LOC105174041	371.403	caffeoylshikimate esterase-like
SiSRO2b	LOC105166546	371.952	transcription factor SRM1-like
SiSRO2b	LOC105157117	375.875	thioredoxin-like 1-2, chloroplastic
SiSRO2b	LOC105173841	376.286	probable protein phosphatase 2C 44
SiSRO2b	LOC105174169	380.657	SEC12-like protein 1
SiSRO2b	LOC105165155	381.521	uncharacterized LOC105165155
SiSRO2b	LOC105175383	383.02	uncharacterized LOC105175383
SiSRO2b	LOC105176120	383.367	acyl-CoA--sterol O-acyltransferase 1-like
SiSRO2b	LOC105176234	385.373	protein-tyrosine-phosphatase PTP1
SiSRO2b	LOC105157987	387.395	BTB/POZ domain-containing protein At5g41330-like
SiSRO2b	LOC105171906	387.871	CASP-like protein PIMP1
SiSRO2b	LOC105170739	388.229	high affinity nitrate transporter 2.4
SiSRO2b	LOC105155836	391.784	autophagy-related protein 8f
SiSRO2b	LOC105177927	392.492	protein ABHD17B
SiSRO2b	LOC105175480	393.017	putative UDP-sugar transporter DDB_G0278631
SiSRO2b	LOC105174859	394.368	LRR receptor-like serine/threonine-protein kinase GSO1
SiSRO2b	LOC105170054	397.324	dirigent protein 22-like
SiSRO2b	LOC105158579	398.748	60S ribosomal protein L23A-like
SiSRO2b	LOC105158271	399.732	inositol polyphosphate multikinase alpha
SiSRO2b	LOC105173672	400.385	uncharacterized LOC105173672
SiSRO2b	LOC105172646	402.123	squalene monooxygenase-like
SiSRO2b	LOC105164143	404.44	F-box protein PP2-A13
SiSRO2b	LOC105169945	404.539	E3 ubiquitin-protein ligase MIEL1
SiSRO2b	LOC105159980	405.284	NAC transcription factor 29
SiSRO2b	LOC105157447	407.284	uncharacterized LOC105157447
SiSRO2b	LOC105171187	407.914	ethylene-responsive transcription factor ERF060
SiSRO2b	LOC105169586	408.338	CCG-binding protein 1
SiSRO2b	LOC105170464	409.241	trans-cinnamate 4-monooxygenase
SiSRO2b	LOC105158784	409.595	probable leucine-rich repeat receptor-like protein kinase At1g35710
SiSRO2b	LOC105168857	411.099	transcription factor bHLH130
SiSRO2b	LOC105171598	412.468	lipoamide acyltransferase component of branched-chain alpha-keto acid dehydrogenase complex, mitochondrial
SiSRO2b	LOC105176805	414.365	MLO-like protein 10
SiSRO2b	LOC105169175	415.375	G-box-binding factor 4
SiSRO2b	LOC105160789	415.663	probable WRKY transcription factor 70
SiSRO2b	LOC105175563	416.785	ethylene-responsive transcription factor 12
SiSRO2b	LOC105159964	416.993	uncharacterized LOC105159964
SiSRO2b	LOC105171805	417.243	major allergen Pru ar 1-like
SiSRO2b	LOC105180324	418.263	probable receptor-like protein kinase At1g11050
SiSRO2b	LOC105179201	418.76	ethylene-responsive transcription factor ERF107
SiSRO2b	LOC105162275	420.847	uncharacterized LOC105162275
SiSRO2b	LOC105172656	422.812	signal peptide peptidase-like 4
SiSRO2b	LOC105164980	425.059	F-box/FBD/LRR-repeat protein At1g13570-like
SiSRO2b	LOC105172336	425.432	aspartyl protease family protein 1-like
SiSRO2b	LOC105168262	427.794	uncharacterized LOC105168262
SiSRO2b	LOC105167943	428.486	equilibrative nucleotide transporter 3
SiSRO2b	LOC105172664	431.773	uncharacterized LOC105172664
SiSRO2b	LOC105172938	431.787	transcription factor bHLH121
SiSRO2b	LOC105166070	438.029	aldehyde oxidase GLOX
SiSRO2b	LOC105178901	438.059	serine carboxypeptidase-like 50
SiSRO2b	LOC105173948	438.269	universal stress protein A-like protein
SiSRO2b	LOC105159850	438.548	probable calcium-binding protein CML49
SiSRO2b	LOC105170861	438.78	probable LRR receptor-like serine/threonine-protein kinase At1g05700
SiSRO2b	LOC105156515	439.873	probable WRKY transcription factor 3
SiSRO2b	LOC105173482	440.786	transcription factor bHLH130-like
SiSRO2b	LOC105160263	442.331	uncharacterized calcium-binding protein At1g02270
SiSRO2b	LOC105171790	444.18	major allergen Pru ar 1-like
SiSRO2b	LOC105162062	445.134	sugar transport protein 14
SiSRO2b	LOC105164701	445.832	zinc finger CCCH domain-containing protein 23
SiSRO2b	LOC105155443	448.395	uncharacterized LOC105155443
SiSRO2b	LOC105177742	449.346	probable transmembrane ascorbate ferrireductase 2
SiSRO2b	LOC105174646	449.828	U-box domain-containing protein 16
SiSRO2b	LOC105171694	451.522	putative F-box protein PP2-B12
SiSRO2b	LOC105170413	453.513	probable serine/threonine-protein kinase PBL10
SiSRO2b	LOC105164677	453.93	abscisic acid receptor PYL2
SiSRO2b	LOC105170782	456.099	GABA transporter 1
SiSRO2b	LOC105169671	458.157	late embryogenesis abundant protein
SiSRO2b	LOC105164499	459.722	probable trehalase
SiSRO2b	LOC105175925	461.142	CTP synthase-like
SiSRO2b	LOC105155178	461.519	probable LRR receptor-like serine/threonine-protein kinase At1g56140
SiSRO2b	LOC105156433	462.402	probable isoprenylcysteine alpha-carbonyl methylesterase ICMEL2
SiSRO2b	LOC105163552	464.037	uncharacterized LOC105163552
SiSRO2b	LOC105177745	465.199	isoprenylcysteine alpha-carbonyl methylesterase ICME
SiSRO2b	LOC105176493	466.553	mitogen-activated protein kinase kinase kinase 1
SiSRO2b	LOC105176633	467.751	probable LRR receptor-like serine/threonine-protein kinase At1g56140
SiSRO2b	LOC105170940	469.242	probable serine/threonine-protein kinase PBL3
SiSRO2b	LOC105170316	469.276	isovaleryl-CoA dehydrogenase, mitochondrial
SiSRO2b	LOC105161756	469.5	uncharacterized LOC105161756
SiSRO2b	LOC105176086	471.708	NAC domain-containing protein 2
SiSRO2b	LOC105159283	476.487	uncharacterized LOC105159283
SiSRO2b	LOC105162702	477.001	phosphatidylinositol 4-kinase gamma 8
SiSRO2b	LOC105175438	477.985	G-type lectin S-receptor-like serine/threonine-protein kinase At1g11330
SiSRO2b	LOC105155896	478.033	pre-mRNA-splicing factor 38B
SiSRO2b	LOC105178631	478.874	VQ motif-containing protein 22-like
SiSRO2b	LOC105176612	482.261	premnaspirodiene oxygenase-like
SiSRO2b	LOC105175022	483.268	methyltransferase-like protein 25
SiSRO2b	LOC105167178	485.535	MLO-like protein 1
SiSRO2b	LOC105158198	485.977	probable S-adenosylmethionine-dependent methyltransferase At5g38100
SiSRO2b	LOC105161519	486.817	ammonium transporter 2
SiSRO2b	LOC105174088	487.885	uridine nucleosidase 1-like
SiSRO2b	LOC105179658	489.347	eIF-2-alpha kinase GCN2
SiSRO2b	LOC105168491	493.368	sterol 14-demethylase
SiSRO2b	LOC105167728	494.163	nudix hydrolase 18, mitochondrial-like
SiSRO2b	LOC105166482	495.364	MACPF domain-containing protein At4g24290
SiSRO2b	LOC105170565	498.267	phosphatidylinositol/phosphatidylcholine transfer protein SFH9-like
